# Supplementary material for: Nomogram Integrating Genomics with Clinicopathologic Features Improves Prognosis Prediction for Colorectal Cancer
Source: Oxford University Press journal article supplement (doi:10.1158/1541-7786.mcr-18-0063), 2018-05-21
Supplement: 15417786mcr180063-sup-195805_2_supp_4706711_p7j01w.xls [file 15417786mcr180063-sup-195805_2_supp_4706711_p7j01w.xls]

## Sheet: prognistic
Supplementary Table S6: Univariate and multivariate analyses of prognostic factors for disease-free survival
Variables	Categories	Univariate analysis				Multivariate analysis
		HR	95% CI	P value		HR	95% CI	P value
Age	≧60/<60years	1.4436	1.08-1.92	0.0117		1.12	1.021-1.269	0.048
Sex	male/female	1.1366	0.85-1.50	0.3706
Tumor location	rectum/colon	0.909	0.68-1.21	0.51
Tumour grade	High/low	1.029	0.71-1.49	0.877
Local invasion	T3-T4/T1-T2	1.1328	1.00-1.28	0.0453		2.206	1.139-7.029	0.027
Lymph node metastasis	N0/N1-N2	4.0473	2.91-5.63	<0.0001		2.28	1.189-3.784	0.021
Distant metastasis	M0/M1	3.1886	2.19-4.62	<0.0001		2.464	1.363-4.453	0.003
TNM stage	I-II/III-IV	3.7322	2.60-5.35	<0.0001		2.151	1.165-3.971	0.014
Agesen	Good/Poor	1.08	0.99-1.18	0.0818
Aziz	Good/Poor	1.11	0.91-1.35	0.3251
Chang	Good/Poor	1.08	0.98-1.20	0.1189
Chen	Good/Poor	1	0.93-1.08	0.9424
Watanabe	Good/Poor	1.11	0.91-1.35	0.3251
Garman	Good/Poor	1.01	1.00-1.02	0.0891
Hao	Good/Poor	1.04	0.79-1.36	0.7804
Jiang	Good/Poor	1.08	0.99-1.18	0.1011
Jorissen	Good/Poor	1.42	1.12-1.80	0.0033		1.1027	0.990-1.229	0.0763136
Kalady	Good/Poor	1.05	0.95-1.15	0.3372
Lin.a	Good/Poor	0.91	0.82-1.00	0.0413		0.46286	0.182-1.178	0.106132
Lin.b	Good/Poor	1.07	0.96-1.19	0.2105
Merlos	Good/Poor	0.96	0.87-1.04	0.3133
Minh	Good/Poor	2.6	1.47-4.61	<0.0001		1.3053	0.689-2.474	0.414
Oh	Good/Poor	1.27	1.06-1.53	0.0089		1.09294	0.996-1.199	0.0595457
Peng	Good/Poor	0.58	0.34-0.97	0.0399		0.894748	0.671-1.194	0.449472
Salazar	Good/Poor	1.16	1.04-1.30	0.0071		1.0805	0.979-1.193	0.124013
Popovici	Good/Poor	2.46	1.18-5.13	<0.0001		1.92004	1.298-2.841	0.00110379
Seven	Good/Poor	1.07	0.98-1.18	0.1252
Shen	Good/Poor	1.1	0.98-1.24	0.1032
Shi	Good/Poor	1.41	0.74-2.67	0.2949
Smith	Good/Poor	1.07	0.96-1.19	0.2105
Toshiaki	Good/Poor	1.1	0.99-1.22	0.0861
Wang	Good/Poor	1	0.90-1.11	0.9948
Fritzmann	Good/Poor	2.33	1.22-4.45	<0.0001		2.1572	1.144-4.069	<0.0001
Xu	Good/Poor	1.16	0.94-1.43	0.1759
