# Supplementary material for: Nomogram Integrating Genomics with Clinicopathologic Features Improves Prognosis Prediction for Colorectal Cancer
Source: Oxford University Press journal article supplement (doi:10.1158/1541-7786.mcr-18-0063), 2018-05-21
Supplement: 15417786mcr180063-sup-195805_2_supp_4706713_p7j01w.xls [file 15417786mcr180063-sup-195805_2_supp_4706713_p7j01w.xls]

## Sheet: Sheet1
Supplementary Table S3：Description of the 27 CRC prognosis-related signatures included in this study
Signature (First Author)	Journal	Year	Signature name (original description)	Cohort endpoint	Signature platform	Original identifier	Gene expression signature		Ref
							Favorable prognosis	Poor prognosis
Agesen	Gut	2012	Recurrence signature in Stage II CRC (ColoGuideEx)	DFS	Affymetrix Exon 1.0 ST	13 Genes	PIGR, CXCL13, MMP3, TUBA1B, CXCL10	SESN1, AZGP1, KLK6, EPHA7, SEMA3A, DSC3, ENPP3, BNIP3	10
Aziz	BMC Medical Genomics	2016	Progression related genes Dukes B and C	5-year survival	DASL assay	19 Genes	C12orf66, MRPL52, GFRA4, LASS6, OR10H5, BRCA1, PDC, TRIP13, OSBPL9, SLC38A9, CPXCR1, DUSP21	DUOX2, TPRIP, SPG7, SORCS2, ELTD1, FRMD6, NOTCH2	42
Chang	Gut	2016	Gene expression profiling-derived immunohistochemistry signature	DFS RFD	Affymetrix HG-U133plus 2.0	95-gene	CXCL14, SLC22A3, LCN2, MAB21L2, CCNA2, NKX2-3, NOS2, FH, CERS6, ALDH1B1, WDR4, LRIG3, NAA15, TTC38, ITIH5, HNRNPM, PWP2, SLC18A2, TCF3, TNRC18, UBE2I, EMID1, PPP6R2, AP2A1, TMEM63A, PTPN11, PCSK7, ANAPC5, SEMA6D, DDAH1, RAD52	ACOXL, ZNF449, SOBP, FGFR1, GUCY1A2, FCN3, SYNPO, TGFB3, ITIH3, GPR68, CFHR2, SDS, HEYL, APOB, NOTCH3, SLC1A3, AGTR1, CDH2, LRRC15, NPL, QKI, DIO2, NPR3, VEGFA, TMTC1, MAP2, COL18A1, PRELP, UACA, FMO2, ZEB1, OLFML2A, INHBB, RGS5, RGS4, HSD11B1, LTBP2, COL4A2, APOC1, C5orf46, CXCL12, PDLIM3, SPARCL1, DFNA5, VIM, SLIT2, COL4A1, TIMP1, CCDC102B, CFH, APOE, GPNMB, MAP1B, BGN, FN1, OLR1, VCAN, FNDC1, …	9
Chen	oncotarget	2016	Gene expression associated with OS	5-year survival	Affymetrix HG-U133plus 2.0	7 Genes	PRR14L, ZDHHC21, NHLRC3, PNPO, PPIP5K2	CCBL1, PTPRB	12
Fritzmann	Gastroenterology	2009	Signature of metastasis prediction in CRC	DFS	Affymetrix U95AV2	123 Probes	SLC25A17, POLD2, RUNX1, BRD3, CRKL, CYB5B, JUND, CASP6, MNT, XRCC5, XRCC5, ATXN2, C5orf21, KLF7, CYP2A13, DKFZ, P564O0823, RUNX1, FRYL, LAGE3, TMCC1, OGT, ENTPD6, TMEM97, AMOTL2, FOXO3, MYCBP2, CAMTA2, SELENBP1, SAT1, ELISC-1, DDX3X, PTPRD, MGAT5, MAOA	LRRFIP1, ANXA3, COPS5, RBP1, SERPINA1, RPS4Y1, B2M, PCK1, TFF3, HIST1H2AE, COL17A1, HRASLS3, BAMBI, RPS12, LSR, SSBP1, APLP2, HSP90B1, NME1, NFIL3, HNRNPA2B, 1, CFB, RABGGTB, UQCRB, FBL, BTF3, DNAJA1, HNRPM, SUB1, CKS2, HSP90AB1, CD47, ERP29, MDK, MDK, EMG1, HERPUD1, GSTP1, DNAJC9, SULT1A3, CCT3, ABP1, TXNDC13, NME1, GSTP1, UBE2E3, TXN, INSIG1, FBL, KANK1, HNRPA3, NACA, TARS, FTH1, PDZK1IP1, PRSS…	27
Garman	PNAS	2008	Recurrence signature derived from stage I/II	Recurrence, OS	Affymetrix HG-U133plus 2.0	50-genes	3-Mar, IQGAP1, CIAPIN1, RAB28, TNFRSF10B, POSTN, FN1, NFYC, FTHP1, FN1, CENPB, LOC552889, ARPC4, U2AF2, PANK3, PRMT7, TRIM36, KLF13, CCL24, USP47, PFAAP5, IL17RC, HNT, HIP1R /// LOC728014, SBF1, ZNF236	PLOD2, FOXO1, TNFRSF1B, GRK6, PTPN11, PARVB, SLC2A5, RAI14, PRKAB1, SRPR, GAS6, RBMS1, DLST /// DLSTP, MFN2, FN1, —, PTPRA, MBD4, NDRG2, PLOD2, PARD6B, FN1, TSFM, OBSL1	55
Hao	J Pathol	2009	Potential predictor of metastasis	DFS	Affymetrix HG-U133plus 2.0	5 gene	DKK1	LYN, SDCBP, MAP4K4	53
Jiang	JMD	2008	Predict Recurrence of Stage II Colon Cancer	DFS	Affymetrix U133a	7-gene	CHC1, YWHAH, LILRB3, CAPG, LAT, EPM2A	KLF5	26
Jorissen	Clin Cancer Res	2009	Metastasis-associated genes signature for stage II-III CRC	6-year recurrence	Affymetrix Plus 2.0	163 Probes	PRKAB2, ASS1, CCL28, CASP1, IGHM, POU2AF1, ADORA2B, IGKV1OR2-108, IGKC, AGPAT5, IGHM, PIGR, PSMB10, IL8, IGLJ3, NTN2L, CASP1, IGKV1D-13, CD79A, N/A, IGL, HLA-C, N/A, N/A, MPDU1, CASP1, NAT1, CASP1, IRF1, N/A, MGC29506, CCL20, IGJ, PIGR, NRARP, C1QBP, IGLJ3, NTN2L, ME2, TNFRSF17, IFI6, IGKC, MOBKL2B, DUOX2, IL8, IGKC, CTA-246H3.1, N/A, PSMB8, IGHA1, CCL28, C6orf105, N/A, KBTBD11, KLF4, IGHG1, C4or…	LOC646324, DCBLD2, ITGB5, SPP1, ASPN, C5orf23, HMCN1, CYP1B1, C9orf47, PRELP, ASPN, LOC339260, CLDN11, PDGFC, MBNL2, ITGBL1, TMCC1, ITGBL1, VKORC1, COMP, TSNARE1, TMCC1, VCAN, THBS2, ZNF117, KCNE4, HNT, FNDC1, SLIT2, HRASLS3, COL8A1, COL10A1, FN1, ZFHX3, COL10A1, ITGBL1, CYP1B1, TMCC1, VAT1, INHBA, IGFBP7, CLEC11A, SPARC, LRRC17, HOP, TIE1, PRELP, N/A, MLLT11, FLT1, AKAP12, TIMP3, SPARC, DCBLD2, …	53
Kalady	J Am Coll Surg	2010	Associated with Early Stage Rectal Cancer Recurrence	OS, DFS	Sentrix Human-6 Expression BeadChip	36-Gene	FAM55D, PIGR, CEACAM7, SLC26A3, LOC651751, SELENBP1, STMN3, DEFB1, LOC649923, SLC39A2, HLA-DRB4, DAZ1 DAZ4, FAM23, HLA-DRA, MAPK12, MS4A12, MCOLN2, LOC652113, REEP1, CLEC4D, ANKRD19, HTR4	SALL4, SPOCK1, HNT, LOC652470, SERPINB5, TNFRSF11B, COL11A1, HOXB8, MMP11, CA9, IGF2, TCN1, KRT17, COMP	50
Lin (a)	Clin Cancer Res	2007	German cohort based gene classifier	DFS	Affymetrix 133A (German tumors)	13 Genes	PSAT1, MAD2L1, TLK1, FAS, CA2, SLC4A4, DLG7, TNFRSF11A	PBK, CXCL10, CXCL9, CXCL11, GZMB, CXCL13, INDO, KITLG, TNFRSF11A, FAS	56
Lin (b)	Clin Cancer Res	2007	New Zealand cohort based gene classifier	DFS	Oligo-spotted (New Zealand tumors)	22 Genes	FLJ11116, SACM1L, PSMC1, PPP2R2A, SCOC, ZBTB20, ZNF410, SOAT1, LOC94794, COX10, PSMD9, ATP2B4	G3BP2, PBK, UBE2L3, GNAS, RNASE2, RBMS1, GTF3C5, HMMR, EIF3S7, ABCC9	56
Merlos-Suarez	Cell Stem Cell	2011	EphB2-derived intestinal stem cells (ISC) signature	DFS	Affymetrix Mouse 4302	226 Probes	ABTB2, ARHGEF4, AXIN2, AFAP1L1, APCDD1, ARNT2, BCL2, BEX1, BEX2, CAP2, CCDC46, CYP2E1, DGKG, DLGAP1, DTL, DYNC2H1, EPHA4, FAM64A, FGFR4, FMNL2, FSTL1, GRAMD1A, GRK4, IGF1R, IGFBP4, IL17RD, KIF12, KIF26B, KLHL13, LDHB, LGR5, LIFR, LOC285141, MDFIC, MPP3, NPNT, PITPNC1, PLP1, RASSF4, RNF157, SCN2B, SEPT6, SERTAD4, SLC1A2, SLC38A4, SLCO3A1, SLIT2, SOAT1, SORBS2, SOX4, TACC1, TMEM182, TNFRSF19, UTRN,…	ANLN, AQP4, ASF1B, ATAD2, ATIC, ATR, AURKA, AURKB, BAG2, BARD1, BBS7, BCL7A, BLM, BRCA1, BUB1, BUB1B, C12orf48, C14orf106, C15orf23, C17orf53, C1orf112, C3orf26, C8orf79, CCDC14, CCDC99, CCNA2, CCNE1, CCNF, CD55, CDC45L, CDC6, CDC7, CDCA2, CDCA5, CELSR2, CENPE, CENPF, CENPI, CENPN, CEP192, CEP55, CHAF1B, CHEK1, CHTF18, CKAP2L, CLSPN, CRTAC1, CTPS, CYP39A1, DACH1, DCK, DCTD, DEPDC1, DIAPH3, DKC1, …	23
Minh	oncotarget	2015	Cox regression analysis with DFS	DFS RFD	Affymetrix HG-U133plus 2.0	113 Probe	F2RL2, WNT5A, IGJ, CCL11, NKX2	KRT80, SP100, PTPN14, TM4SF1, CAV2, CDH2, PI15, DOCK4, HOXC6, DCBLD2, ANXA1, PCSK5, FLJ38472, PXDN, FN1, AKAP12, SLC2A3, GPX3, COL1A1, COL3A1, NRP1, CTGF, POSTN, PPAPDC1A, COL5A1, NNMT, MAP1B, LOXL1, COL5A2, C5AR1, APOE, PDLIM3, IGFBP3, ZNF532, SMARCA1, AHNAK2, LOC100288985, DPYSL3, KCNE4, SERPINE1, ARL4C, CD109, OLFML2B, FABP4, BCAT1, HOPX, VCAN, WISP1, FRMD6, FBN1, NTM, ECM2, IBSP, LOC646324, P…	45
Oh	Gut	2011	CRC subtype related signature	DFS, OS	Affymetrix Plus 2.0	114 Probes	REG4, DUSP4, CYP1B1, SERPINB5, REG4, PTGS2, COL10A1, SDR16C5, LYZ, CALB1, CTSE, ANO1, VNN1, KLK10, CALB1, SPP1, SFRP2, GAS1, CXCL5, CD109, SPON1, LOX, RARRES1, RARRES1, PLA2G4A, SFRP2, OLR1, RARRES1, IGF2BP3, ALOX5, TMEM45A, ZIC2, COL11A1, PTGS2, CD55, MEIS2, IL8, COL11A1, BAG2, POSTN, CRIP1, CD55, LOX, GCNT3, PLK2, FCGR3B, RAB27B, ADAM12, CXCR4, AGR3, CD55, TCN1, TNFAIP6, GPNMB, ANXA1, DUSP4, TN…	DEFA6, QPRT, DPEP1, MUC12, DACH1, CTL, ABAT, AMACR, AXIN2, CHN2, PLCB4, CELP, VAV3, APCDD1, CFTR, PTPRO, LRRC19, ACE2, LOC100288092, CE1, ACE2, ACSL6, KRT23, QPRT, NOX1, VAV3, C13orf18, PLCB4, CTTNBP2, VAV3, ENPP3, SLC3A1, MEP1A, TDGF1, ASCL2, ABAT, ACSL6, C13orf18, EREG, FABP1, UGT2A3, SLC26A3, LY6G6D, C10orf99, C10orf99	13
Peng	Int J Colorectal Dis	2010	Relapse signature from stage II-III CRC	3-year relapse	DASL Cancer Panel (Illumina Inc.)	8 Genes	SRC, MXI1, TRAF4	SYK, IGF1, ARNT, MMP2, CBFA2T1	51
Popovici	J Clin Oncol	2012	BRAF-mutant gene expression signature	OS, DFS	A customized Affymetrix chip	64 genes	C13orf18, DDC, PPP1R14D, HSF5, SATB2, TNNC2, GGH, SPINK1, PTPRO, ZSWIM1, RNF43, CELP, CBFA2T2, PTPRD, CDX2, TSPAN6, VAV3, CFTR, PHYH, PLCB4, ZNF141, PPP1R14C, FLJ32063, APCDD1, ACOX1, C10orf99, MIR142, ARID3A, C20orf111, AMACR, AIFM3, CTTNBP2	CTSE, AQP5, REG4, RSBN1L, RASSF6, CRIP1, PPPDE2, PLK2, TM4SF4, MLPH, RBM8A, SOX8, PIWIL1, LOC388199, S100A16, RBBP8, OSBP2, KLK10, DUSP4, HOXD3, C11orf9, CD55, TRNP1, FSCN1, KIAA0802, PLLP, IRX3, SLC25A37, PIK3AP1, TPK1, ZIC2, SERPINB5	14
Salazar	J Clin Oncol	2011	Recurrence signature for stage II and III CRC	5-year distant metastasis	Agilent 44K	18 Genes	ZNF697, SLC6A11, IL2RA, CYFIP2, PIM3, LIF, PLIN3, HSD3B1, ZBED4, PPARA, THNSL2, CA4388O2	MCTP1, PYROX D1, IL2RB, LAMA3, CTSC, EDEM1	49
Shen	Molecular Cancer	2015	recurrent related signature for stage II/III	5-year DFS	Affymetrix Plus 2.0	31 Genes	STMN2, SCG5, GENE30, GENE24, PROS1, SPATA18, CDH1, IGF2R, C5orf23, NUP210, MMP2, GENE18, CDCA2, PBK, MMP9, PTGS2, GENE29, DEPDC1	GENE31, GENE8, TIMP1, LOC730102, NME1, PLK4, VEGFA, RGL3, NDRG1, BRIP1, LOC400713, AKR1C2, MMP3, TNFRSF11B, GADD45B, LOC253264, MEG3, MYBL2, GENE28, TAF11, CD44, GENE3, LOC339524, VEGFC, CTNNB1, UBD, C9orf116	48
Shi	PeerJ	2016	functionally important mutated genes	5-year DFS	Affymetrix Plus 2.0	9 Genes	PTEN	APC, MLH1, MSH2, MSH6, TP53, TGFBR2, SMAD4, KRAS	46
Smith	Gastroenterology	2009	Derived from invasive, murine colon cancer cells	Recurrence, OS	Affymetrix Plus 2.0	34 Genes	CRABP1, MMP13, MYOT, DFNB31, HPSE, TEX11, SYT17, MUM1L1, SLC25A30, CSN3, NMNAT3, DENND2A, CIRBP, SPDYA, S100A3, PRTN3, C20orf74, HS3ST5	TMEM14, EGR1, VDR, CXCR7, MGP, AK1, ACTB, HES1, C6orf64, NQO1, STOX2, ACYP2, SPRY4, DCTD, TACC2, PDLIM5	43
Sveen	Clin Cancer Res	2012	Recurrence signature for stage II and III CRC	DFS	Affymetrix Human Exon 1.0 ST Array	7 Genes	CXCL9, OLFM4, UGT2B17	DMBT1, NT5E, SEMA3A, WNT11	11
Teodoro	oncotarget	2015	ColoLipidGene signature	5-year DFS	Taq-Man Low Density Array/Affymetrix Plus 2.0	4 Genes		SCD, AGPAT1, ACSL1, ABCA1	47
Toshiaki	EJC	2010	Metastasis-associated genes signature	DFS	Affymetrix HG-U133 Plus 2.0 GeneChips	10 gene	NAPB, KHDRBS3, AREG, EREG	CD74, TRGV9, GZMA, HLA-DRA, PTGS2, LCK	52
Wang	J Clin Oncol	2004	Relapse-related signature in Duke’s B colon cancer	3-year relapse	Affymetrix 133A	23 Probes	NUFIP1, RCC1, CAPG, LAT, LILRB3, YWHAH, EPM2A	FAM30A, GPATCH3, FLJ20712, CHD2, ADGRE3, PADI4, ADAMTS12, KLF5, CDH17, APOC1, AGXT, LDLRAP1	46
Watanabe	Cancer	2009	Recurrence signature in Stage III CRC	DFS	Affymetrix Plus 2.0	45 Probes	EDAR, GSTM3, NR1D2, ZFY, ZNF236, TBDN100, DDX3Y, NR5A2, CABIN1, CXCL6, ITGA2, PON2, S100A10, HIPK1, CYP51P2, TRAF4, DKFZP564K196	ATF7IP2, SAMHD1, GPR54, INPP4B, COPS7B, AMN, FLJ35863, C20orf100, FLJ35740, LTB4R, LOC92154, REPIN1, ARHGAP4, LOC139202(1), LOC139202(2), LOC139202(3), LOC139202(4), LOC139202(5)	54
Xu	Gene	2016	recurrent related signature	5-year survival	Affymetrix HG-U133plus 2.0	15 gene	MUSK, HTR6, HES5, ZNF417, OR8D2, GLRA2, KLRK1, GRIP2	FABP6, RHEB, AKAP12, NCRNA00152, HOXA7, VEGFA, PMEPA1	44
