# Supplementary material for: Nomogram Integrating Genomics with Clinicopathologic Features Improves Prognosis Prediction for Colorectal Cancer
Source: Oxford University Press journal article supplement (doi:10.1158/1541-7786.mcr-18-0063), 2018-05-21
Supplement: 15417786mcr180063-sup-195805_2_supp_4706716_p7j01x.xls [file 15417786mcr180063-sup-195805_2_supp_4706716_p7j01x.xls]

## Sheet: Sheet1
Supplementary Table S4:Significantly enriched GO and KEGG categories
NO.	GO/KEGG categorie	FDR	NG	Ncommon
BP.n..1	cell cycle	FDR= 1.17e-08	(ng=296)	(ncommon=43)
BP.n..2	response to DNA damage stimulus	FDR= 1.85e-08	(ng=180)	(ncommon=31)
BP.n..3	cell cycle process	FDR= 1.85e-08	(ng=219)	(ncommon=35)
BP.n..4	mitotic cell cycle	FDR= 4.14e-07	(ng=160)	(ncommon=27)
BP.n..5	M phase	FDR= 4.14e-07	(ng=112)	(ncommon=22)
BP.n..6	positive regulation of cellular biosynthetic process	FDR= 4.14e-07	(ng=313)	(ncommon=40)
BP.n..7	M phase of mitotic cell cycle	FDR= 4.14e-07	(ng=123)	(ncommon=23)
BP.n..8	cell cycle checkpoint	FDR= 5.64e-07	(ng=35)	(ncommon=12)
BP.n..9	cellular response to stress	FDR= 9.26e-07	(ng=350)	(ncommon=41)
BP.n..10	nuclear division	FDR= 9.26e-07	(ng=121)	(ncommon=22)
BP.n..11	mitosis	FDR= 9.26e-07	(ng=121)	(ncommon=22)
BP.n..12	regulation of cell proliferation	FDR= 1.10e-06	(ng=363)	(ncommon=43)
BP.n..13	cell cycle phase	FDR= 1.75e-06	(ng=147)	(ncommon=24)
BP.n..14	response to wounding	FDR= 2.12e-06	(ng=182)	(ncommon=27)
BP.n..15	positive regulation of gene expression	FDR= 2.12e-06	(ng=266)	(ncommon=34)
BP.n..16	positive regulation of cell proliferation	FDR= 2.12e-06	(ng=205)	(ncommon=29)
BP.n..17	organelle fission	FDR= 2.96e-06	(ng=92)	(ncommon=18)
BP.n..18	positive regulation of biosynthetic process	FDR= 3.49e-06	(ng=416)	(ncommon=45)
BP.n..19	positive regulation of transcription	FDR= 3.49e-06	(ng=261)	(ncommon=33)
BP.n..20	response to steroid hormone stimulus	FDR= 3.69e-06	(ng=66)	(ncommon=15)
BP.n..21	positive regulation of transcription, DNA-dependent	FDR= 3.73e-06	(ng=226)	(ncommon=30)
BP.n..22	immune response	FDR= 4.23e-06	(ng=305)	(ncommon=36)
BP.n..23	positive regulation of RNA metabolic process	FDR= 4.55e-06	(ng=229)	(ncommon=30)
BP.n..24	positive regulation of macromolecule biosynthetic process	FDR= 5.23e-06	(ng=398)	(ncommon=43)
BP.n..25	positive regulation of nitrogen compound metabolic process	FDR= 7.39e-06	(ng=390)	(ncommon=42)
BP.n..26	chemotaxis	FDR= 7.39e-06	(ng=80)	(ncommon=16)
BP.n..27	taxis	FDR= 7.39e-06	(ng=80)	(ncommon=16)
BP.n..28	response to estrogen stimulus	FDR= 1.10e-05	(ng=20)	(ncommon= 8)
BP.n..29	positive regulation of nucleobase, nucleoside, nucleotide and nucleic acid metabolic process	FDR= 1.73e-05	(ng=378)	(ncommon=40)
BP.n..30	regulation of cell cycle	FDR= 1.93e-05	(ng=120)	(ncommon=19)
BP.n..31	DNA metabolic process	FDR= 2.03e-05	(ng=188)	(ncommon=25)
BP.n..32	locomotory behavior	FDR= 2.03e-05	(ng=97)	(ncommon=17)
BP.n..33	chromosome segregation	FDR= 2.03e-05	(ng=35)	(ncommon=10)
BP.n..34	meiotic cell cycle	FDR= 2.21e-05	(ng=43)	(ncommon=11)
BP.n..35	positive regulation of cell differentiation	FDR= 2.49e-05	(ng=79)	(ncommon=15)
BP.n..36	sensory perception of smell	FDR= 2.58e-05	(ng=377)	(ncommon= 2)
BP.n..37	sensory perception of chemical stimulus	FDR= 2.59e-05	(ng=380)	(ncommon= 2)
BP.n..38	positive regulation of transcription from RNA polymerase II promoter	FDR= 3.02e-05	(ng=180)	(ncommon=24)
BP.n..39	positive regulation of macromolecule metabolic process	FDR= 3.30e-05	(ng=476)	(ncommon=46)
BP.n..40	immune system development	FDR= 4.72e-05	(ng=94)	(ncommon=16)
BP.n..41	DNA replication initiation	FDR= 5.15e-05	(ng=13)	(ncommon= 6)
BP.n..42	meiosis	FDR= 5.51e-05	(ng=25)	(ncommon= 8)
BP.n..43	M phase of meiotic cell cycle	FDR= 5.51e-05	(ng=25)	(ncommon= 8)
BP.n..44	organic acid biosynthetic process	FDR= 5.51e-05	(ng=67)	(ncommon=13)
BP.n..45	carboxylic acid biosynthetic process	FDR= 5.51e-05	(ng=67)	(ncommon=13)
BP.n..46	positive regulation of protein metabolic process	FDR= 6.24e-05	(ng=97)	(ncommon=16)
BP.n..47	defense response	FDR= 6.30e-05	(ng=295)	(ncommon=32)
BP.n..48	DNA repair	FDR= 1.02e-04	(ng=114)	(ncommon=17)
BP.n..49	regulation of apoptosis	FDR= 1.21e-04	(ng=360)	(ncommon=36)
BP.n..50	negative regulation of cell differentiation	FDR= 1.21e-04	(ng=92)	(ncommon=15)
BP.n..51	regulation of programmed cell death	FDR= 1.21e-04	(ng=361)	(ncommon=36)
BP.n..52	metaphase plate congression	FDR= 1.21e-04	(ng=6)	(ncommon= 4)
BP.n..53	regulation of cell death	FDR= 1.21e-04	(ng=362)	(ncommon=36)
BP.n..54	mitotic sister chromatid segregation	FDR= 1.21e-04	(ng=10)	(ncommon= 5)
BP.n..55	sister chromatid segregation	FDR= 1.21e-04	(ng=10)	(ncommon= 5)
BP.n..56	sensory perception	FDR= 1.46e-04	(ng=487)	(ncommon= 6)
BP.n..57	G-protein coupled receptor protein signaling pathway	FDR= 1.55e-04	(ng=755)	(ncommon=14)
BP.n..58	positive regulation of developmental process	FDR= 2.02e-04	(ng=97)	(ncommon=15)
BP.n..59	positive regulation of apoptosis	FDR= 2.41e-04	(ng=198)	(ncommon=23)
BP.n..60	positive regulation of programmed cell death	FDR= 2.41e-04	(ng=198)	(ncommon=23)
BP.n..61	positive regulation of cell death	FDR= 2.57e-04	(ng=199)	(ncommon=23)
BP.n..62	hemopoietic or lymphoid organ development	FDR= 2.75e-04	(ng=89)	(ncommon=14)
BP.n..63	chromosome localization	FDR= 2.84e-04	(ng=7)	(ncommon= 4)
BP.n..64	establishment of chromosome localization	FDR= 2.84e-04	(ng=7)	(ncommon= 4)
BP.n..65	extracellular structure organization	FDR= 2.98e-04	(ng=92)	(ncommon=14)
BP.n..66	regulation of mitotic cell cycle	FDR= 3.98e-04	(ng=52)	(ncommon=10)
BP.n..67	positive regulation of cellular protein metabolic process	FDR= 5.29e-04	(ng=95)	(ncommon=14)
BP.n..68	microtubule cytoskeleton organization	FDR= 5.46e-04	(ng=54)	(ncommon=10)
BP.n..69	chromosome condensation	FDR= 5.87e-04	(ng=8)	(ncommon= 4)
BP.n..70	DNA recombination	FDR= 5.87e-04	(ng=27)	(ncommon= 7)
BP.n..71	regulation of transcription from RNA polymerase II promoter	FDR= 5.97e-04	(ng=366)	(ncommon=34)
BP.n..72	fatty acid metabolic process	FDR= 6.19e-04	(ng=98)	(ncommon=14)
BP.n..73	inflammatory response	FDR= 6.39e-04	(ng=185)	(ncommon=21)
BP.n..74	negative regulation of macromolecule metabolic process	FDR= 6.39e-04	(ng=351)	(ncommon=33)
BP.n..75	cognition	FDR= 6.39e-04	(ng=512)	(ncommon= 8)
BP.n..76	extracellular matrix organization	FDR= 6.39e-04	(ng=47)	(ncommon= 9)
BP.n..77	cholesterol metabolic process	FDR= 6.70e-04	(ng=56)	(ncommon=10)
BP.n..78	regulation of cell development	FDR= 6.76e-04	(ng=76)	(ncommon=12)
BP.n..79	collagen catabolic process	FDR= 7.05e-04	(ng=14)	(ncommon= 5)
BP.n..80	collagen metabolic process	FDR= 7.05e-04	(ng=14)	(ncommon= 5)
BP.n..81	multicellular organismal catabolic process	FDR= 7.05e-04	(ng=14)	(ncommon= 5)
BP.n..82	multicellular organismal macromolecule metabolic process	FDR= 7.05e-04	(ng=14)	(ncommon= 5)
BP.n..83	steroid metabolic process	FDR= 7.85e-04	(ng=139)	(ncommon=17)
BP.n..84	cell proliferation	FDR= 9.47e-04	(ng=204)	(ncommon=23)
BP.n..85	sterol metabolic process	FDR= 9.62e-04	(ng=60)	(ncommon=10)
BP.n..86	meiosis I	FDR= 9.94e-04	(ng=15)	(ncommon= 5)
BP.n..87	multicellular organismal metabolic process	FDR= 9.94e-04	(ng=15)	(ncommon= 5)
BP.n..88	response to organic substance	FDR= 1.01e-03	(ng=332)	(ncommon=31)
BP.n..89	cell activation	FDR= 1.06e-03	(ng=104)	(ncommon=14)
BP.n..90	mitotic metaphase plate congression	FDR= 1.18e-03	(ng=5)	(ncommon= 3)
BP.n..91	regulation of microtubule cytoskeleton organization	FDR= 1.24e-03	(ng=23)	(ncommon= 6)
BP.n..92	response to cytokine stimulus	FDR= 1.35e-03	(ng=16)	(ncommon= 5)
BP.n..93	induction of apoptosis	FDR= 1.35e-03	(ng=160)	(ncommon=18)
BP.n..94	induction of programmed cell death	FDR= 1.35e-03	(ng=160)	(ncommon=18)
BP.n..95	establishment of organelle localization	FDR= 1.36e-03	(ng=32)	(ncommon= 7)
BP.n..96	DNA damage checkpoint	FDR= 1.36e-03	(ng=11)	(ncommon= 4)
BP.n..97	reciprocal meiotic recombination	FDR= 1.36e-03	(ng=10)	(ncommon= 4)
BP.n..98	DNA integrity checkpoint	FDR= 1.36e-03	(ng=11)	(ncommon= 4)
BP.n..99	plasma lipoprotein particle assembly	FDR= 1.36e-03	(ng=10)	(ncommon= 4)
BP.n..100	protein-lipid complex assembly	FDR= 1.36e-03	(ng=10)	(ncommon= 4)
BP.n..101	DNA-dependent DNA replication	FDR= 1.43e-03	(ng=24)	(ncommon= 6)
BP.n..102	cytoskeleton organization	FDR= 1.43e-03	(ng=124)	(ncommon=15)
BP.n..103	cell part morphogenesis	FDR= 1.43e-03	(ng=122)	(ncommon=15)
BP.n..104	regulation of phosphorylation	FDR= 1.50e-03	(ng=224)	(ncommon=23)
BP.n..105	regulation of growth	FDR= 1.65e-03	(ng=99)	(ncommon=13)
BP.n..106	positive regulation of ubiquitin-protein ligase activity during mitotic cell cycle	FDR= 1.70e-03	(ng=43)	(ncommon= 8)
BP.n..107	regulation of ubiquitin-protein ligase activity during mitotic cell cycle	FDR= 1.70e-03	(ng=43)	(ncommon= 8)
BP.n..108	regulation of microtubule-based process	FDR= 1.74e-03	(ng=25)	(ncommon= 6)
BP.n..109	leukocyte activation	FDR= 1.75e-03	(ng=99)	(ncommon=13)
BP.n..110	regulation of phosphate metabolic process	FDR= 1.79e-03	(ng=234)	(ncommon=24)
BP.n..111	regulation of phosphorus metabolic process	FDR= 1.79e-03	(ng=234)	(ncommon=24)
BP.n..112	regulation of locomotion	FDR= 1.84e-03	(ng=76)	(ncommon=11)
BP.n..113	positive regulation of protein ubiquitination	FDR= 1.84e-03	(ng=44)	(ncommon= 8)
BP.n..114	regulation of ligase activity	FDR= 1.84e-03	(ng=44)	(ncommon= 8)
BP.n..115	positive regulation of ligase activity	FDR= 1.84e-03	(ng=44)	(ncommon= 8)
BP.n..116	regulation of ubiquitin-protein ligase activity	FDR= 1.84e-03	(ng=44)	(ncommon= 8)
BP.n..117	positive regulation of ubiquitin-protein ligase activity	FDR= 1.84e-03	(ng=44)	(ncommon= 8)
BP.n..118	positive regulation of DNA replication	FDR= 1.85e-03	(ng=11)	(ncommon= 4)
BP.n..119	cell projection morphogenesis	FDR= 1.86e-03	(ng=114)	(ncommon=14)
BP.n..120	behavior	FDR= 1.90e-03	(ng=193)	(ncommon=20)
BP.n..121	phosphorus metabolic process	FDR= 1.94e-03	(ng=621)	(ncommon=48)
BP.n..122	phosphate metabolic process	FDR= 1.94e-03	(ng=621)	(ncommon=48)
BP.n..123	cell migration	FDR= 1.94e-03	(ng=45)	(ncommon= 8)
BP.n..124	regulation of protein ubiquitination	FDR= 1.94e-03	(ng=45)	(ncommon= 8)
BP.n..125	immunoglobulin production during immune response	FDR= 1.94e-03	(ng=6)	(ncommon= 3)
BP.n..126	mitotic chromosome condensation	FDR= 1.94e-03	(ng=6)	(ncommon= 3)
BP.n..127	positive regulation of cyclic nucleotide metabolic process	FDR= 1.94e-03	(ng=6)	(ncommon= 3)
BP.n..128	positive regulation of cyclic nucleotide biosynthetic process	FDR= 1.94e-03	(ng=6)	(ncommon= 3)
BP.n..129	positive regulation of nucleotide biosynthetic process	FDR= 1.94e-03	(ng=6)	(ncommon= 3)
BP.n..130	negative regulation of DNA recombination	FDR= 1.94e-03	(ng=6)	(ncommon= 3)
BP.n..131	positive regulation of nucleotide metabolic process	FDR= 1.94e-03	(ng=6)	(ncommon= 3)
BP.n..132	negative regulation of lipid biosynthetic process	FDR= 1.94e-03	(ng=6)	(ncommon= 3)
BP.n..133	positive regulation of catalytic activity	FDR= 2.09e-03	(ng=339)	(ncommon=30)
BP.n..134	negative regulation of macromolecule biosynthetic process	FDR= 2.15e-03	(ng=181)	(ncommon=19)
BP.n..135	regulation of cell adhesion	FDR= 2.17e-03	(ng=46)	(ncommon= 8)
BP.n..136	regulation of cytoskeleton organization	FDR= 2.51e-03	(ng=47)	(ncommon= 8)
BP.n..137	DNA replication	FDR= 2.59e-03	(ng=58)	(ncommon= 9)
BP.n..138	skeletal system development	FDR= 2.64e-03	(ng=106)	(ncommon=13)
BP.n..139	regulation of DNA replication	FDR= 2.64e-03	(ng=28)	(ncommon= 6)
BP.n..140	microtubule-based movement	FDR= 2.75e-03	(ng=95)	(ncommon=12)
BP.n..141	tube development	FDR= 2.83e-03	(ng=107)	(ncommon=13)
BP.n..142	regulation of organelle organization	FDR= 2.86e-03	(ng=38)	(ncommon= 7)
BP.n..143	regulation of catabolic process	FDR= 2.86e-03	(ng=20)	(ncommon= 5)
BP.n..144	response to metal ion	FDR= 2.86e-03	(ng=20)	(ncommon= 5)
BP.n..145	regulation of lymphocyte activation	FDR= 2.91e-03	(ng=95)	(ncommon=12)
BP.n..146	response to inorganic substance	FDR= 3.06e-03	(ng=29)	(ncommon= 6)
BP.n..147	cell motility	FDR= 3.06e-03	(ng=49)	(ncommon= 8)
BP.n..148	localization of cell	FDR= 3.06e-03	(ng=49)	(ncommon= 8)
BP.n..149	nucleotide-excision repair, DNA gap filling	FDR= 3.11e-03	(ng=13)	(ncommon= 4)
BP.n..150	regulation of steroid metabolic process	FDR= 3.11e-03	(ng=13)	(ncommon= 4)
BP.n..151	macromolecular complex remodeling	FDR= 3.11e-03	(ng=13)	(ncommon= 4)
BP.n..152	protein-lipid complex remodeling	FDR= 3.11e-03	(ng=13)	(ncommon= 4)
BP.n..153	plasma lipoprotein particle remodeling	FDR= 3.11e-03	(ng=13)	(ncommon= 4)
BP.n..154	cell division	FDR= 3.12e-03	(ng=85)	(ncommon=11)
BP.n..155	DNA synthesis during DNA repair	FDR= 3.17e-03	(ng=7)	(ncommon= 3)
BP.n..156	regulation of smooth muscle cell migration	FDR= 3.17e-03	(ng=7)	(ncommon= 3)
BP.n..157	regulation of gene-specific transcription	FDR= 3.27e-03	(ng=61)	(ncommon= 9)
BP.n..158	collagen fibril organization	FDR= 3.34e-03	(ng=21)	(ncommon= 5)
BP.n..159	cell projection organization	FDR= 3.60e-03	(ng=165)	(ncommon=17)
BP.n..160	response to nutrient	FDR= 3.69e-03	(ng=76)	(ncommon=10)
BP.n..161	negative regulation of transcription, DNA-dependent	FDR= 3.69e-03	(ng=125)	(ncommon=14)
BP.n..162	negative regulation of RNA metabolic process	FDR= 3.81e-03	(ng=180)	(ncommon=18)
BP.n..163	embryonic morphogenesis	FDR= 3.87e-03	(ng=165)	(ncommon=17)
BP.n..164	lymphocyte activation	FDR= 3.89e-03	(ng=87)	(ncommon=11)
BP.n..165	regulation of lipid metabolic process	FDR= 3.89e-03	(ng=31)	(ncommon= 6)
BP.n..166	positive regulation of locomotion	FDR= 3.89e-03	(ng=41)	(ncommon= 7)
BP.n..167	regulation of leukocyte activation	FDR= 3.89e-03	(ng=75)	(ncommon=10)
BP.n..168	regulation of foam cell differentiation	FDR= 3.89e-03	(ng=14)	(ncommon= 4)
BP.n..169	oxidation reduction	FDR= 3.89e-03	(ng=397)	(ncommon=32)
BP.n..170	response to hypoxia	FDR= 3.89e-03	(ng=22)	(ncommon= 5)
BP.n..171	pyrimidine nucleotide metabolic process	FDR= 3.89e-03	(ng=22)	(ncommon= 5)
BP.n..172	anaphase-promoting complex-dependent proteasomal ubiquitin-dependent protein catabolic process	FDR= 4.31e-03	(ng=42)	(ncommon= 7)
BP.n..173	negative regulation of ligase activity	FDR= 4.31e-03	(ng=42)	(ncommon= 7)
BP.n..174	negative regulation of ubiquitin-protein ligase activity during mitotic cell cycle	FDR= 4.31e-03	(ng=42)	(ncommon= 7)
BP.n..175	negative regulation of ubiquitin-protein ligase activity	FDR= 4.31e-03	(ng=42)	(ncommon= 7)
BP.n..176	regulation of cell morphogenesis involved in differentiation	FDR= 4.35e-03	(ng=53)	(ncommon= 8)
BP.n..177	positive regulation of immune system process	FDR= 4.40e-03	(ng=102)	(ncommon=12)
BP.n..178	regulation of cell activation	FDR= 4.51e-03	(ng=77)	(ncommon=10)
BP.n..179	regulation of cell migration	FDR= 4.51e-03	(ng=65)	(ncommon= 9)
BP.n..180	eye development	FDR= 4.51e-03	(ng=23)	(ncommon= 5)
BP.n..181	response to oxygen levels	FDR= 4.51e-03	(ng=23)	(ncommon= 5)
BP.n..182	positive regulation of cholesterol esterification	FDR= 4.51e-03	(ng=8)	(ncommon= 3)
BP.n..183	aspartate transport	FDR= 4.51e-03	(ng=8)	(ncommon= 3)
BP.n..184	stem cell maintenance	FDR= 4.51e-03	(ng=8)	(ncommon= 3)
BP.n..185	stem cell development	FDR= 4.51e-03	(ng=8)	(ncommon= 3)
BP.n..186	anti-apoptosis	FDR= 4.55e-03	(ng=103)	(ncommon=12)
BP.n..187	negative regulation of protein ubiquitination	FDR= 4.64e-03	(ng=43)	(ncommon= 7)
BP.n..188	regulation of smooth muscle cell proliferation	FDR= 4.72e-03	(ng=15)	(ncommon= 4)
BP.n..189	positive regulation of DNA metabolic process	FDR= 4.72e-03	(ng=15)	(ncommon= 4)
BP.n..190	cellular component morphogenesis	FDR= 5.07e-03	(ng=121)	(ncommon=13)
BP.n..191	positive regulation of lymphocyte activation	FDR= 5.79e-03	(ng=68)	(ncommon= 9)
BP.n..192	positive regulation of catabolic process	FDR= 5.97e-03	(ng=16)	(ncommon= 4)
BP.n..193	sterol transport	FDR= 5.97e-03	(ng=16)	(ncommon= 4)
BP.n..194	cholesterol transport	FDR= 5.97e-03	(ng=16)	(ncommon= 4)
BP.n..195	DNA damage response, signal transduction	FDR= 5.97e-03	(ng=18)	(ncommon= 4)
BP.n..196	regulation of inflammatory response	FDR= 5.97e-03	(ng=16)	(ncommon= 4)
BP.n..197	positive regulation of protein modification process	FDR= 6.20e-03	(ng=57)	(ncommon= 8)
BP.n..198	gland development	FDR= 6.24e-03	(ng=25)	(ncommon= 5)
BP.n..199	negative regulation of nucleobase, nucleoside, nucleotide and nucleic acid metabolic process	FDR= 6.37e-03	(ng=163)	(ncommon=16)
BP.n..200	cell fate determination	FDR= 6.38e-03	(ng=9)	(ncommon= 3)
BP.n..201	regulation of cholesterol esterification	FDR= 6.38e-03	(ng=9)	(ncommon= 3)
BP.n..202	negative regulation of cell cycle process	FDR= 6.38e-03	(ng=9)	(ncommon= 3)
BP.n..203	negative regulation of cellular biosynthetic process	FDR= 6.44e-03	(ng=265)	(ncommon=23)
BP.n..204	cellular cation homeostasis	FDR= 6.81e-03	(ng=96)	(ncommon=11)
BP.n..205	homeostatic process	FDR= 6.81e-03	(ng=331)	(ncommon=28)
BP.n..206	female pregnancy	FDR= 7.10e-03	(ng=47)	(ncommon= 7)
BP.n..207	icosanoid metabolic process	FDR= 7.14e-03	(ng=26)	(ncommon= 5)
BP.n..208	unsaturated fatty acid metabolic process	FDR= 7.14e-03	(ng=26)	(ncommon= 5)
BP.n..209	regulation of lipid biosynthetic process	FDR= 7.16e-03	(ng=17)	(ncommon= 4)
BP.n..210	anatomical structure homeostasis	FDR= 7.16e-03	(ng=17)	(ncommon= 4)
BP.n..211	negative regulation of transcription	FDR= 7.18e-03	(ng=151)	(ncommon=15)
BP.n..212	positive regulation of leukocyte activation	FDR= 7.18e-03	(ng=72)	(ncommon= 9)
BP.n..213	proteasomal protein catabolic process	FDR= 7.18e-03	(ng=48)	(ncommon= 7)
BP.n..214	proteasomal ubiquitin-dependent protein catabolic process	FDR= 7.18e-03	(ng=48)	(ncommon= 7)
BP.n..215	regulation of protein modification process	FDR= 7.18e-03	(ng=85)	(ncommon=10)
BP.n..216	positive regulation of response to stimulus	FDR= 7.18e-03	(ng=85)	(ncommon=10)
BP.n..217	pyridoxine metabolic process	FDR= 7.18e-03	(ng=4)	(ncommon= 2)
BP.n..218	pyridoxine biosynthetic process	FDR= 7.18e-03	(ng=4)	(ncommon= 2)
BP.n..219	auditory receptor cell fate commitment	FDR= 7.18e-03	(ng=4)	(ncommon= 2)
BP.n..220	regulation of gonadotropin secretion	FDR= 7.18e-03	(ng=4)	(ncommon= 2)
BP.n..221	negative regulation of gonadotropin secretion	FDR= 7.18e-03	(ng=4)	(ncommon= 2)
BP.n..222	positive regulation of gonadotropin secretion	FDR= 7.18e-03	(ng=4)	(ncommon= 2)
BP.n..223	vitamin B6 metabolic process	FDR= 7.18e-03	(ng=4)	(ncommon= 2)
BP.n..224	vitamin B6 biosynthetic process	FDR= 7.18e-03	(ng=4)	(ncommon= 2)
BP.n..225	malate-aspartate shuttle	FDR= 7.18e-03	(ng=4)	(ncommon= 2)
BP.n..226	maintenance of DNA repeat elements	FDR= 7.18e-03	(ng=4)	(ncommon= 2)
BP.n..227	negative regulation of fatty acid biosynthetic process	FDR= 7.18e-03	(ng=4)	(ncommon= 2)
BP.n..228	regulation of follicle-stimulating hormone secretion	FDR= 7.18e-03	(ng=4)	(ncommon= 2)
BP.n..229	positive regulation of follicle-stimulating hormone secretion	FDR= 7.18e-03	(ng=4)	(ncommon= 2)
BP.n..230	negative regulation of follicle-stimulating hormone secretion	FDR= 7.18e-03	(ng=4)	(ncommon= 2)
BP.n..231	leukemia inhibitory factor signaling pathway	FDR= 7.18e-03	(ng=4)	(ncommon= 2)
BP.n..232	kinetochore organization	FDR= 7.18e-03	(ng=4)	(ncommon= 2)
BP.n..233	inner ear receptor cell fate commitment	FDR= 7.18e-03	(ng=4)	(ncommon= 2)
BP.n..234	D-aspartate transport	FDR= 7.18e-03	(ng=4)	(ncommon= 2)
BP.n..235	D-aspartate import	FDR= 7.18e-03	(ng=4)	(ncommon= 2)
BP.n..236	negative regulation of cell proliferation	FDR= 7.51e-03	(ng=154)	(ncommon=15)
BP.n..237	regulation of cell motion	FDR= 7.52e-03	(ng=73)	(ncommon= 9)
BP.n..238	L-glutamate transport	FDR= 7.77e-03	(ng=10)	(ncommon= 3)
BP.n..239	lipoprotein particle clearance	FDR= 7.77e-03	(ng=10)	(ncommon= 3)
BP.n..240	negative regulation of neuron differentiation	FDR= 7.77e-03	(ng=10)	(ncommon= 3)
BP.n..241	positive regulation of gene-specific transcription	FDR= 7.98e-03	(ng=38)	(ncommon= 6)
BP.n..242	positive regulation of cell activation	FDR= 8.05e-03	(ng=74)	(ncommon= 9)
BP.n..243	regulation of kinase activity	FDR= 8.05e-03	(ng=140)	(ncommon=14)
BP.n..244	neurological system process	FDR= 8.18e-03	(ng=590)	(ncommon=15)
BP.n..245	positive regulation of molecular function	FDR= 8.21e-03	(ng=291)	(ncommon=24)
BP.n..246	negative regulation of nitrogen compound metabolic process	FDR= 8.38e-03	(ng=164)	(ncommon=16)
BP.n..247	cell-substrate adhesion	FDR= 8.45e-03	(ng=28)	(ncommon= 5)
BP.n..248	neuron projection development	FDR= 8.74e-03	(ng=125)	(ncommon=13)
BP.n..249	positive regulation of cell motion	FDR= 8.74e-03	(ng=39)	(ncommon= 6)
BP.n..250	interphase	FDR= 8.74e-03	(ng=39)	(ncommon= 6)
BP.n..251	interphase of mitotic cell cycle	FDR= 8.74e-03	(ng=39)	(ncommon= 6)
BP.n..252	negative regulation of biosynthetic process	FDR= 8.74e-03	(ng=271)	(ncommon=23)
BP.n..253	regulation of axonogenesis	FDR= 9.65e-03	(ng=29)	(ncommon= 5)
BP.n..254	regulation of transferase activity	FDR= 9.74e-03	(ng=145)	(ncommon=14)
BP.n..255	organelle localization	FDR= 9.74e-03	(ng=40)	(ncommon= 6)
BP.n..256	innate immune response	FDR= 9.74e-03	(ng=64)	(ncommon= 8)
BP.n..257	sensory organ development	FDR= 9.82e-03	(ng=77)	(ncommon= 9)
MF.n..1	chemokine activity	FDR= 2.74e-06	(ng=43)	(ncommon=13)
MF.n..2	chemokine receptor binding	FDR= 2.74e-06	(ng=45)	(ncommon=13)
MF.n..3	glycosaminoglycan binding	FDR= 5.34e-05	(ng=45)	(ncommon=11)
MF.n..4	olfactory receptor activity	FDR= 6.36e-05	(ng=374)	(ncommon= 2)
MF.n..5	extracellular matrix structural constituent	FDR= 1.77e-04	(ng=33)	(ncommon= 9)
MF.n..6	heparin binding	FDR= 2.54e-04	(ng=38)	(ncommon= 9)
MF.n..7	protein heterodimerization activity	FDR= 2.81e-04	(ng=104)	(ncommon=16)
MF.n..8	enzyme binding	FDR= 6.81e-04	(ng=255)	(ncommon=27)
MF.n..9	pattern binding	FDR= 8.04e-04	(ng=29)	(ncommon= 7)
MF.n..10	polysaccharide binding	FDR= 8.04e-04	(ng=29)	(ncommon= 7)
MF.n..11	nucleotide binding	FDR= 8.04e-04	(ng=1030)	(ncommon=75)
MF.n..12	cytokine activity	FDR= 8.04e-04	(ng=131)	(ncommon=17)
MF.n..13	growth factor binding	FDR= 8.04e-04	(ng=44)	(ncommon= 9)
MF.n..14	platelet-derived growth factor binding	FDR= 8.04e-04	(ng=8)	(ncommon= 4)
MF.n..15	insulin-like growth factor binding	FDR= 8.04e-04	(ng=20)	(ncommon= 6)
MF.n..16	promoter binding	FDR= 8.04e-04	(ng=20)	(ncommon= 6)
MF.n..17	purine nucleotide binding	FDR= 9.82e-04	(ng=888)	(ncommon=66)
MF.n..18	chromatin binding	FDR= 1.13e-03	(ng=38)	(ncommon= 8)
MF.n..19	mispaired DNA binding	FDR= 1.38e-03	(ng=5)	(ncommon= 3)
MF.n..20	guanine/thymine mispair binding	FDR= 1.38e-03	(ng=5)	(ncommon= 3)
MF.n..21	mismatch repair complex binding	FDR= 1.38e-03	(ng=5)	(ncommon= 3)
MF.n..22	adenyl nucleotide binding	FDR= 1.38e-03	(ng=726)	(ncommon=55)
MF.n..23	purine nucleoside binding	FDR= 1.83e-03	(ng=733)	(ncommon=55)
MF.n..24	transcription regulator activity	FDR= 1.83e-03	(ng=803)	(ncommon=59)
MF.n..25	nucleoside binding	FDR= 1.83e-03	(ng=735)	(ncommon=55)
MF.n..26	identical protein binding	FDR= 1.96e-03	(ng=192)	(ncommon=20)
MF.n..27	structure-specific DNA binding	FDR= 2.08e-03	(ng=55)	(ncommon= 9)
MF.n..28	kinase binding	FDR= 2.08e-03	(ng=65)	(ncommon=10)
MF.n..29	exonuclease activity, active with either ribo- or deoxyribonucleic acids and producing 5'-phosphomonoesters	FDR= 2.08e-03	(ng=11)	(ncommon= 4)
MF.n..30	carbohydrate binding	FDR= 2.22e-03	(ng=198)	(ncommon=20)
MF.n..31	double-stranded DNA binding	FDR= 3.63e-03	(ng=38)	(ncommon= 7)
MF.n..32	transmembrane receptor protein tyrosine kinase activity	FDR= 4.42e-03	(ng=30)	(ncommon= 6)
MF.n..33	ribonucleotide binding	FDR= 4.42e-03	(ng=856)	(ncommon=60)
MF.n..34	purine ribonucleotide binding	FDR= 4.42e-03	(ng=856)	(ncommon=60)
MF.n..35	tubulin binding	FDR= 4.42e-03	(ng=40)	(ncommon= 7)
MF.n..36	protein tyrosine kinase activity	FDR= 4.56e-03	(ng=74)	(ncommon=10)
MF.n..37	exonuclease activity	FDR= 4.97e-03	(ng=22)	(ncommon= 5)
MF.n..38	protein dimerization activity	FDR= 5.10e-03	(ng=89)	(ncommon=11)
MF.n..39	ATP binding	FDR= 5.33e-03	(ng=682)	(ncommon=49)
MF.n..40	adenyl ribonucleotide binding	FDR= 5.37e-03	(ng=687)	(ncommon=49)
MF.n..41	protein tyrosine phosphatase activity	FDR= 5.37e-03	(ng=77)	(ncommon=10)
MF.n..42	oxidoreductase activity, acting on the CH-NH2 group of donors	FDR= 5.37e-03	(ng=8)	(ncommon= 3)
MF.n..43	oxidoreductase activity, acting on the CH-NH2 group of donors, oxygen as acceptor	FDR= 5.37e-03	(ng=8)	(ncommon= 3)
MF.n..44	DNA-directed DNA polymerase activity	FDR= 7.64e-03	(ng=25)	(ncommon= 5)
MF.n..45	amine transmembrane transporter activity	FDR= 7.64e-03	(ng=70)	(ncommon= 9)
MF.n..46	structural constituent of cytoskeleton	FDR= 7.64e-03	(ng=47)	(ncommon= 7)
MF.n..47	DNA polymerase activity	FDR= 7.64e-03	(ng=26)	(ncommon= 5)
MF.n..48	microtubule motor activity	FDR= 7.64e-03	(ng=72)	(ncommon= 9)
MF.n..49	serine-type endopeptidase activity	FDR= 7.64e-03	(ng=73)	(ncommon= 9)
MF.n..50	four-way junction DNA binding	FDR= 7.64e-03	(ng=4)	(ncommon= 2)
MF.n..51	ribonucleoside-diphosphate reductase activity	FDR= 7.64e-03	(ng=4)	(ncommon= 2)
MF.n..52	interleukin-2 receptor activity	FDR= 7.64e-03	(ng=4)	(ncommon= 2)
MF.n..53	vascular endothelial growth factor receptor binding	FDR= 7.64e-03	(ng=4)	(ncommon= 2)
MF.n..54	oxidoreductase activity, acting on CH or CH2 groups, disulfide as acceptor	FDR= 7.64e-03	(ng=4)	(ncommon= 2)
MF.n..55	aryl hydrocarbon receptor binding	FDR= 7.64e-03	(ng=4)	(ncommon= 2)
MF.n..56	interleukin-2 binding	FDR= 7.64e-03	(ng=4)	(ncommon= 2)
MF.n..57	single base insertion or deletion binding	FDR= 7.64e-03	(ng=4)	(ncommon= 2)
MF.n..58	single guanine insertion binding	FDR= 7.64e-03	(ng=4)	(ncommon= 2)
MF.n..59	oxidized DNA binding	FDR= 7.64e-03	(ng=4)	(ncommon= 2)
MF.n..60	oxidized purine DNA binding	FDR= 7.64e-03	(ng=4)	(ncommon= 2)
MF.n..61	polo kinase kinase activity	FDR= 7.64e-03	(ng=4)	(ncommon= 2)
MF.n..62	DNA-dependent ATPase activity	FDR= 7.88e-03	(ng=27)	(ncommon= 5)
MF.n..63	carboxylic acid binding	FDR= 7.93e-03	(ng=63)	(ncommon= 8)
MF.n..64	sterol transporter activity	FDR= 7.93e-03	(ng=10)	(ncommon= 3)
MF.n..65	cholesterol transporter activity	FDR= 7.93e-03	(ng=10)	(ncommon= 3)
MF.n..66	FAD binding	FDR= 8.05e-03	(ng=38)	(ncommon= 6)
MF.n..67	RNA polymerase II transcription factor activity	FDR= 8.43e-03	(ng=141)	(ncommon=14)
MF.n..68	protein homodimerization activity	FDR= 8.43e-03	(ng=51)	(ncommon= 7)
MF.n..69	sequence-specific DNA binding	FDR= 9.12e-03	(ng=342)	(ncommon=27)
MF.n..70	microtubule binding	FDR= 9.12e-03	(ng=19)	(ncommon= 4)
MF.n..71	transmembrane receptor protein phosphatase activity	FDR= 9.12e-03	(ng=19)	(ncommon= 4)
CC.n..1	proteinaceous extracellular matrix	FDR= 5.93e-12	(ng=171)	(ncommon= 35)
CC.n..2	extracellular matrix	FDR= 2.27e-11	(ng=128)	(ncommon= 29)
CC.n..3	extracellular region part	FDR= 3.72e-10	(ng=605)	(ncommon= 68)
CC.n..4	extracellular region	FDR= 3.72e-10	(ng=1179)	(ncommon=107)
CC.n..5	condensed chromosome	FDR= 3.03e-09	(ng=81)	(ncommon= 20)
CC.n..6	extracellular matrix part	FDR= 1.16e-06	(ng=40)	(ncommon= 12)
CC.n..7	basement membrane	FDR= 1.32e-06	(ng=34)	(ncommon= 11)
CC.n..8	condensed chromosome, centromeric region	FDR= 1.41e-06	(ng=50)	(ncommon= 13)
CC.n..9	collagen	FDR= 7.31e-06	(ng=33)	(ncommon= 10)
CC.n..10	condensed chromosome kinetochore	FDR= 9.04e-06	(ng=35)	(ncommon= 10)
CC.n..11	organelle lumen	FDR= 1.04e-05	(ng=862)	(ncommon= 72)
CC.n..12	membrane-enclosed lumen	FDR= 1.07e-05	(ng=876)	(ncommon= 73)
CC.n..13	extracellular space	FDR= 3.19e-05	(ng=368)	(ncommon= 38)
CC.n..14	kinetochore	FDR= 4.36e-05	(ng=42)	(ncommon= 10)
CC.n..15	spindle	FDR= 1.07e-04	(ng=84)	(ncommon= 14)
CC.n..16	fibrillar collagen	FDR= 1.46e-04	(ng=11)	(ncommon= 5)
CC.n..17	intracellular organelle lumen	FDR= 1.74e-04	(ng=846)	(ncommon= 66)
CC.n..18	platelet alpha granule lumen	FDR= 2.06e-04	(ng=12)	(ncommon= 5)
CC.n..19	vesicle lumen	FDR= 2.06e-04	(ng=12)	(ncommon= 5)
CC.n..20	cytoplasmic membrane-bounded vesicle lumen	FDR= 2.06e-04	(ng=12)	(ncommon= 5)
CC.n..21	nuclear chromosome	FDR= 2.16e-04	(ng=94)	(ncommon= 14)
CC.n..22	nucleoplasm	FDR= 3.21e-04	(ng=420)	(ncommon= 38)
CC.n..23	microtubule cytoskeleton	FDR= 4.57e-04	(ng=255)	(ncommon= 26)
CC.n..24	outer kinetochore of condensed chromosome	FDR= 7.48e-04	(ng=5)	(ncommon= 3)
CC.n..25	immunological synapse	FDR= 7.48e-04	(ng=5)	(ncommon= 3)
CC.n..26	mismatch repair complex	FDR= 7.48e-04	(ng=5)	(ncommon= 3)
CC.n..27	nuclear ubiquitin ligase complex	FDR= 9.20e-04	(ng=10)	(ncommon= 4)
CC.n..28	platelet alpha granule	FDR= 1.94e-03	(ng=27)	(ncommon= 6)
CC.n..29	cell projection	FDR= 2.16e-03	(ng=211)	(ncommon= 21)
CC.n..30	chromosome, centromeric region	FDR= 2.16e-03	(ng=59)	(ncommon= 9)
CC.n..31	nuclear chromosome part	FDR= 2.67e-03	(ng=51)	(ncommon= 8)
CC.n..32	non-membrane-bounded organelle	FDR= 3.63e-03	(ng=1269)	(ncommon= 83)
CC.n..33	intracellular non-membrane-bounded organelle	FDR= 3.63e-03	(ng=1269)	(ncommon= 83)
CC.n..34	cytosol	FDR= 4.27e-03	(ng=643)	(ncommon= 47)
CC.n..35	sheet-forming collagen	FDR= 4.27e-03	(ng=8)	(ncommon= 3)
CC.n..36	peroxisome	FDR= 4.27e-03	(ng=54)	(ncommon= 8)
CC.n..37	microbody	FDR= 4.27e-03	(ng=54)	(ncommon= 8)
CC.n..38	nuclear lumen	FDR= 5.09e-03	(ng=684)	(ncommon= 49)
CC.n..39	neuron projection	FDR= 5.09e-03	(ng=205)	(ncommon= 19)
CC.n..40	condensed nuclear chromosome	FDR= 6.79e-03	(ng=28)	(ncommon= 5)
CC.n..41	collagen type V	FDR= 7.27e-03	(ng=4)	(ncommon= 2)
CC.n..42	compact myelin	FDR= 7.27e-03	(ng=4)	(ncommon= 2)
CC.n..43	plasma membrane part	FDR= 7.27e-03	(ng=1293)	(ncommon= 82)
CC.n..44	cytoplasmic vesicle part	FDR= 7.41e-03	(ng=74)	(ncommon= 9)
CC.n..45	proteasome complex	FDR= 7.42e-03	(ng=49)	(ncommon= 7)
CC.n..46	chylomicron	FDR= 7.42e-03	(ng=11)	(ncommon= 3)
CC.n..47	PML body	FDR= 9.12e-03	(ng=19)	(ncommon= 4)
Pathway.n..1	Hepatic Fibrosis / Hepatic Stellate Cell Activation	FDR= 1.70e-11	(ng=137)	(ncommon=31)
Pathway.n..2	Granulocyte Adhesion and Diapedesis	FDR= 9.09e-07	(ng=163)	(ncommon=26)
Pathway.n..3	Agranulocyte Adhesion and Diapedesis	FDR= 2.23e-06	(ng=173)	(ncommon=26)
Pathway.n..4	Ovarian Cancer Signaling	FDR= 4.11e-06	(ng=130)	(ncommon=22)
Pathway.n..5	Atherosclerosis Signaling	FDR= 5.53e-06	(ng=119)	(ncommon=20)
Pathway.n..6	Role of BRCA1 in DNA Damage Response	FDR= 8.33e-06	(ng=60)	(ncommon=14)
Pathway.n..7	Aryl Hydrocarbon Receptor Signaling	FDR= 1.27e-05	(ng=133)	(ncommon=21)
Pathway.n..8	Cell Cycle Control of Chromosomal Replication	FDR= 3.01e-05	(ng=27)	(ncommon= 8)
Pathway.n..9	Mismatch Repair in Eukaryotes	FDR= 3.67e-05	(ng=16)	(ncommon= 7)
Pathway.n..10	HIF1_ Signaling	FDR= 3.67e-05	(ng=100)	(ncommon=17)
Pathway.n..11	Colorectal Cancer Metastasis Signaling	FDR= 4.37e-05	(ng=232)	(ncommon=28)
Pathway.n..12	Role of Tissue Factor in Cancer	FDR= 7.80e-05	(ng=107)	(ncommon=17)
Pathway.n..13	Leukocyte Extravasation Signaling	FDR= 7.80e-05	(ng=192)	(ncommon=24)
Pathway.n..14	Hereditary Breast Cancer Signaling	FDR= 1.10e-04	(ng=112)	(ncommon=17)
Pathway.n..15	Wnt/_-catenin Signaling	FDR= 2.48e-04	(ng=167)	(ncommon=21)
Pathway.n..16	Inhibition of Matrix Metalloproteases	FDR= 2.84e-04	(ng=38)	(ncommon= 9)
Pathway.n..17	p53 Signaling	FDR= 4.60e-04	(ng=93)	(ncommon=14)
Pathway.n..18	IL-17 Signaling	FDR= 5.38e-04	(ng=72)	(ncommon=12)
Pathway.n..19	Role of IL-17A in Psoriasis	FDR= 5.90e-04	(ng=13)	(ncommon= 5)
Pathway.n..20	Pancreatic Adenocarcinoma Signaling	FDR= 5.90e-04	(ng=106)	(ncommon=15)
Pathway.n..21	IL-8 Signaling	FDR= 6.15e-04	(ng=183)	(ncommon=21)
Pathway.n..22	Hypoxia Signaling in the Cardiovascular System	FDR= 6.22e-04	(ng=63)	(ncommon=11)
Pathway.n..23	Role of Osteoblasts, Osteoclasts and Chondrocytes in Rheumatoid Arthritis	FDR= 6.65e-04	(ng=214)	(ncommon=23)
Pathway.n..24	Bladder Cancer Signaling	FDR= 6.87e-04	(ng=86)	(ncommon=13)
Pathway.n..25	DNA Double-Strand Break Repair by Homologous Recombination	FDR= 7.13e-04	(ng=13)	(ncommon= 5)
Pathway.n..26	Factors Promoting Cardiogenesis in Vertebrates	FDR= 7.13e-04	(ng=87)	(ncommon=13)
Pathway.n..27	Regulation of the Epithelial-Mesenchymal Transition Pathway	FDR= 7.72e-04	(ng=175)	(ncommon=20)
Pathway.n..28	VEGF Signaling	FDR= 8.34e-04	(ng=89)	(ncommon=13)
Pathway.n..29	LPS/IL-1 Mediated Inhibition of RXR Function	FDR= 9.11e-04	(ng=210)	(ncommon=22)
Pathway.n..30	PTEN Signaling	FDR= 9.77e-04	(ng=115)	(ncommon=15)
Pathway.n..31	Epithelial Adherens Junction Signaling	FDR= 1.02e-03	(ng=144)	(ncommon=17)
Pathway.n..32	Human Embryonic Stem Cell Pluripotency	FDR= 1.33e-03	(ng=132)	(ncommon=16)
Pathway.n..33	Glioblastoma Multiforme Signaling	FDR= 1.33e-03	(ng=145)	(ncommon=17)
Pathway.n..34	PI3K/AKT Signaling	FDR= 1.37e-03	(ng=120)	(ncommon=15)
Pathway.n..35	Neuregulin Signaling	FDR= 1.39e-03	(ng=85)	(ncommon=12)
Pathway.n..36	Inhibition of Angiogenesis by TSP1	FDR= 1.43e-03	(ng=32)	(ncommon= 7)
Pathway.n..37	Remodeling of Epithelial Adherens Junctions	FDR= 1.59e-03	(ng=66)	(ncommon=10)
Pathway.n..38	Role of Oct4 in Mammalian Embryonic Stem Cell Pluripotency	FDR= 1.78e-03	(ng=44)	(ncommon= 8)
Pathway.n..39	Role of Macrophages, Fibroblasts and Endothelial Cells in Rheumatoid Arthritis	FDR= 1.83e-03	(ng=282)	(ncommon=26)
Pathway.n..40	IL-17A Signaling in Gastric Cells	FDR= 1.83e-03	(ng=25)	(ncommon= 6)
Pathway.n..41	Role of IL-17A in Arthritis	FDR= 1.83e-03	(ng=54)	(ncommon= 9)
Pathway.n..42	Role of CHK Proteins in Cell Cycle Checkpoint Control	FDR= 2.05e-03	(ng=55)	(ncommon= 9)
Pathway.n..43	ILK Signaling	FDR= 2.11e-03	(ng=181)	(ncommon=19)
Pathway.n..44	Chemokine Signaling	FDR= 2.19e-03	(ng=68)	(ncommon=10)
Pathway.n..45	Myc Mediated Apoptosis Signaling	FDR= 2.76e-03	(ng=58)	(ncommon= 9)
Pathway.n..46	ATM Signaling	FDR= 2.76e-03	(ng=59)	(ncommon= 9)
Pathway.n..47	GADD45 Signaling	FDR= 2.76e-03	(ng=19)	(ncommon= 5)
Pathway.n..48	Ephrin Receptor Signaling	FDR= 2.80e-03	(ng=172)	(ncommon=18)
Pathway.n..49	Axonal Guidance Signaling	FDR= 3.83e-03	(ng=421)	(ncommon=34)
Pathway.n..50	Mitotic Roles of Polo-Like Kinase	FDR= 4.03e-03	(ng=62)	(ncommon= 9)
Pathway.n..51	Thyroid Cancer Signaling	FDR= 4.03e-03	(ng=40)	(ncommon= 7)
Pathway.n..52	Glucocorticoid Receptor Signaling	FDR= 4.19e-03	(ng=255)	(ncommon=23)
Pathway.n..53	Role of IL-17F in Allergic Inflammatory Airway Diseases	FDR= 4.46e-03	(ng=41)	(ncommon= 7)
Pathway.n..54	Endometrial Cancer Signaling	FDR= 4.46e-03	(ng=52)	(ncommon= 8)
Pathway.n..55	Polyamine Regulation in Colon Cancer	FDR= 4.64e-03	(ng=22)	(ncommon= 5)
Pathway.n..56	LXR/RXR Activation	FDR= 4.64e-03	(ng=121)	(ncommon=13)
Pathway.n..57	Virus Entry via Endocytic Pathways	FDR= 4.64e-03	(ng=89)	(ncommon=11)
Pathway.n..58	UVC-Induced MAPK Signaling	FDR= 4.72e-03	(ng=42)	(ncommon= 7)
Pathway.n..59	VDR/RXR Activation	FDR= 4.72e-03	(ng=77)	(ncommon=10)
Pathway.n..60	Cell Cycle: G2/M DNA Damage Checkpoint Regulation	FDR= 5.23e-03	(ng=43)	(ncommon= 7)
Pathway.n..61	Clathrin-mediated Endocytosis Signaling	FDR= 5.40e-03	(ng=182)	(ncommon=18)
Pathway.n..62	Agrin Interactions at Neuromuscular Junction	FDR= 5.62e-03	(ng=67)	(ncommon= 9)
Pathway.n..63	Prostate Cancer Signaling	FDR= 5.84e-03	(ng=80)	(ncommon=10)
Pathway.n..64	Antigen Presentation Pathway	FDR= 6.18e-03	(ng=34)	(ncommon= 6)
Pathway.n..65	Airway Pathology in Chronic Obstructive Pulmonary Disease	FDR= 6.25e-03	(ng=8)	(ncommon= 3)
Pathway.n..66	Glioma Invasiveness Signaling	FDR= 6.51e-03	(ng=57)	(ncommon= 8)
Pathway.n..67	Mouse Embryonic Stem Cell Pluripotency	FDR= 6.54e-03	(ng=95)	(ncommon=11)
Pathway.n..68	Putrescine Degradation III	FDR= 6.75e-03	(ng=16)	(ncommon= 4)
Pathway.n..69	Tryptophan Degradation X (Mammalian, via Tryptamine)	FDR= 6.75e-03	(ng=16)	(ncommon= 4)
Pathway.n..70	IGF-1 Signaling	FDR= 6.75e-03	(ng=96)	(ncommon=11)
Pathway.n..71	TGF-_ Signaling	FDR= 6.75e-03	(ng=83)	(ncommon=10)
Pathway.n..72	Protein Ubiquitination Pathway	FDR= 7.19e-03	(ng=253)	(ncommon=22)
Pathway.n..73	Induction of Apoptosis by HIV1	FDR= 7.19e-03	(ng=59)	(ncommon= 8)
Pathway.n..74	Inosine-5'-phosphate Biosynthesis II	FDR= 7.19e-03	(ng=3)	(ncommon= 2)
Pathway.n..75	Antiproliferative Role of TOB in T Cell Signaling	FDR= 7.43e-03	(ng=26)	(ncommon= 5)
Pathway.n..76	Pathogenesis of Multiple Sclerosis	FDR= 7.74e-03	(ng=9)	(ncommon= 3)
Pathway.n..77	eNOS Signaling	FDR= 8.35e-03	(ng=124)	(ncommon=13)
Pathway.n..78	Molecular Mechanisms of Cancer	FDR= 9.05e-03	(ng=335)	(ncommon=27)
Pathway.n..79	HER-2 Signaling in Breast Cancer	FDR= 9.26e-03	(ng=76)	(ncommon= 9)
Pathway.n..80	Rac Signaling	FDR= 9.27e-03	(ng=103)	(ncommon=11)
Pathway.n..81	Intrinsic Prothrombin Activation Pathway	FDR= 9.50e-03	(ng=28)	(ncommon= 5)
