# Supplementary material for: Nomogram Integrating Genomics with Clinicopathologic Features Improves Prognosis Prediction for Colorectal Cancer
Source: Oxford University Press journal article supplement (doi:10.1158/1541-7786.mcr-18-0063), 2018-05-21
Supplement: 15417786mcr180063-sup-195805_2_supp_4706721_p7j01y.xls [file 15417786mcr180063-sup-195805_2_supp_4706721_p7j01y.xls]

## Sheet: Sheet1
Supplementary Table S5. Description of CRC patients of the 9 public datasets
Characteristic		GSE17536	GSE17537	GSE14333	GSE37892	GSE12945	GSE24551	GSE29621	GSE39582	GSE41258
Platform		U133Plus2	U133Plus2	U133Plus2	U133Plus2	U133A	Exon 1.0 ST	U133Plus2	U133Plus2	U133A
Sample size		177	55	290	130	62	160	65	585	186
Age, y
	Median	65	62	65	68	64	NA	64	66	63
	Range, y	26-92	23-94	26-92	22-97	38-87		38-87	22-97	19-87
Gender, n (%)
	Male	96 (54.2)	26 (47.3)	164 (61.4)	69 (53.1)	34 (54.8)	NA	40(61.5)	362(61.8)	88 (52.7)
	Female	81 (45.8)	29 (52.7)	126 (38.6)	61 (46.9)	28 (45.2)	NA	25(28.5)	322(38.2)	98 (47.3)
Location, n (%)
	Colon	NA	NA	125 (77.2)	130 (100)	29 (46.8)	NA	NA	351(60.0)	106 (92.3)
	Rectum	NA	NA	165 (22.8)	0 (0)	33 (53.2)	NA	NA	234(40.0)	80 (7.7)
Stage, n (%)*
	I	24 (13.6)	4 (7.3)	43 (14.9)	0 (0)	13 (21.0)	0 (0)	7(10.8)	42(7.1）	29(15.4)
	II	57 (32.2)	15 (27.3)	106 (36.6)	73 (56.2)	23 (37.1)	90 (56.3)	22(33.8)	271(46.3)	50 (26.4)
	III	57 (32.2)	19 (34.5)	86(29.7)	57 (43.8)	21 (33.9)	70 (43.8)	18(27.6)	210(35.8)	49 (26.9)
	IV	39 (22.0)	17 (30.9)	55(18.8)	0 (0)	5 (8.1)	0 (0)	18(27.8)	62(10.8)	58 (31.3)
Grade, n (%)
	Well	16 (9.0)	3 (5.5)	NA	NA	0 (0)	NA	4()	60(10.2)	37(19.8)
	Moderate	134 (75.7)	32 (58.2)	NA	NA	31 (50.0)	NA	51()	421(79.1)	98(52.6)
	Poor	27 (14.3)	1 (1.8)	NA	NA	31 (50.0)	NA	10()	104(10.7)	40(21.5)
	NA	0 (0)	19 (34.5)	290 (100)	130 (100)	0 (0)	NA	0(0)	0(0)	11(6.1)
DFS, n†
	Event, n (%)	32 (23.7)	3 (7.9)	67 (83.8)	37 (28.5)	8 (14.5)	62 (38.8)	21(32.3)	194(33.2)	45 (24.2)
	Median, m	38.1	50.5	40.2	42.8	49.7	43.7	44.1	49.6	79.4
	Range, m	0.9-142.6	0.4-70.4	1.8-84.9	0.6-103.1	0.3-64.0	2.0-120.0	3.6-105.1	2.0-192.4	2.0-203.0
* Duke stages were mapped into AJCC stages. † Only patients with stage I-III were included in this item. NA, information not available; DFS, disease free survival.
