# Supplementary material for: Nomogram Integrating Genomics with Clinicopathologic Features Improves Prognosis Prediction for Colorectal Cancer
Source: Oxford University Press journal article supplement (doi:10.1158/1541-7786.mcr-18-0063), 2018-05-21
Supplement: 15417786mcr180063-sup-195805_2_supp_4706759_p7j1jc.xls [file 15417786mcr180063-sup-195805_2_supp_4706759_p7j1jc.xls]

## Sheet: Supplementary Table S2
Supplementary Table S1: Eligible patient inclusion in this study
No.	Samples	GEO.accession	Platforms	subgroup
1	GSM1012279	GSE41258	Affy U133A	Validation
2	GSM1012285	GSE41258	Affy U133A	Training
3	GSM1012288	GSE41258	Affy U133A	Training
4	GSM1012291	GSE41258	Affy U133A	Validation
5	GSM1012292	GSE41258	Affy U133A	Training
6	GSM1012296	GSE41258	Affy U133A	Validation
7	GSM1012297	GSE41258	Affy U133A	Training
8	GSM1012299	GSE41258	Affy U133A	Training
9	GSM1012306	GSE41258	Affy U133A	Training
10	GSM1012308	GSE41258	Affy U133A	Validation
11	GSM1012309	GSE41258	Affy U133A	Validation
12	GSM1012310	GSE41258	Affy U133A	Training
13	GSM1012313	GSE41258	Affy U133A	Validation
14	GSM1012316	GSE41258	Affy U133A	Training
15	GSM1012320	GSE41258	Affy U133A	Validation
16	GSM1012321	GSE41258	Affy U133A	Training
17	GSM1012322	GSE41258	Affy U133A	Training
18	GSM1012323	GSE41258	Affy U133A	Validation
19	GSM1012324	GSE41258	Affy U133A	Training
20	GSM1012325	GSE41258	Affy U133A	Training
21	GSM1012327	GSE41258	Affy U133A	Validation
22	GSM1012329	GSE41258	Affy U133A	Training
23	GSM1012331	GSE41258	Affy U133A	Training
24	GSM1012332	GSE41258	Affy U133A	Training
25	GSM1012333	GSE41258	Affy U133A	Validation
26	GSM1012336	GSE41258	Affy U133A	Validation
27	GSM1012339	GSE41258	Affy U133A	Training
28	GSM1012346	GSE41258	Affy U133A	Validation
29	GSM1012352	GSE41258	Affy U133A	Validation
30	GSM1012356	GSE41258	Affy U133A	Training
31	GSM1012359	GSE41258	Affy U133A	Validation
32	GSM1012361	GSE41258	Affy U133A	Validation
33	GSM1012362	GSE41258	Affy U133A	Training
34	GSM1012363	GSE41258	Affy U133A	Training
35	GSM1012364	GSE41258	Affy U133A	Training
36	GSM1012365	GSE41258	Affy U133A	Training
37	GSM1012366	GSE41258	Affy U133A	Training
38	GSM1012368	GSE41258	Affy U133A	Training
39	GSM1012371	GSE41258	Affy U133A	Validation
40	GSM1012372	GSE41258	Affy U133A	Training
41	GSM1012373	GSE41258	Affy U133A	Validation
42	GSM1012377	GSE41258	Affy U133A	Validation
43	GSM1012379	GSE41258	Affy U133A	Training
44	GSM1012381	GSE41258	Affy U133A	Training
45	GSM1012382	GSE41258	Affy U133A	Validation
46	GSM1012383	GSE41258	Affy U133A	Training
47	GSM1012385	GSE41258	Affy U133A	Validation
48	GSM1012386	GSE41258	Affy U133A	Validation
49	GSM1012389	GSE41258	Affy U133A	Training
50	GSM1012390	GSE41258	Affy U133A	Validation
51	GSM1012391	GSE41258	Affy U133A	Validation
52	GSM1012393	GSE41258	Affy U133A	Validation
53	GSM1012394	GSE41258	Affy U133A	Validation
54	GSM1012401	GSE41258	Affy U133A	Training
55	GSM1012403	GSE41258	Affy U133A	Training
56	GSM1012404	GSE41258	Affy U133A	Validation
57	GSM1012405	GSE41258	Affy U133A	Training
58	GSM1012407	GSE41258	Affy U133A	Training
59	GSM1012410	GSE41258	Affy U133A	Training
60	GSM1012411	GSE41258	Affy U133A	Training
61	GSM1012414	GSE41258	Affy U133A	Training
62	GSM1012415	GSE41258	Affy U133A	Validation
63	GSM1012416	GSE41258	Affy U133A	Training
64	GSM1012417	GSE41258	Affy U133A	Validation
65	GSM1012420	GSE41258	Affy U133A	Validation
66	GSM1012421	GSE41258	Affy U133A	Training
67	GSM1012422	GSE41258	Affy U133A	Validation
68	GSM1012424	GSE41258	Affy U133A	Validation
69	GSM1012425	GSE41258	Affy U133A	Validation
70	GSM1012426	GSE41258	Affy U133A	Training
71	GSM1012432	GSE41258	Affy U133A	Training
72	GSM1012435	GSE41258	Affy U133A	Training
73	GSM1012436	GSE41258	Affy U133A	Validation
74	GSM1012437	GSE41258	Affy U133A	Validation
75	GSM1012438	GSE41258	Affy U133A	Training
76	GSM1012440	GSE41258	Affy U133A	Training
77	GSM1012441	GSE41258	Affy U133A	Validation
78	GSM1012443	GSE41258	Affy U133A	Validation
79	GSM1012445	GSE41258	Affy U133A	Training
80	GSM1012447	GSE41258	Affy U133A	Training
81	GSM1012448	GSE41258	Affy U133A	Training
82	GSM1012451	GSE41258	Affy U133A	Training
83	GSM1012452	GSE41258	Affy U133A	Training
84	GSM1012455	GSE41258	Affy U133A	Validation
85	GSM1012458	GSE41258	Affy U133A	Validation
86	GSM1012459	GSE41258	Affy U133A	Validation
87	GSM1012461	GSE41258	Affy U133A	Training
88	GSM1012465	GSE41258	Affy U133A	Validation
89	GSM1012466	GSE41258	Affy U133A	Validation
90	GSM1012468	GSE41258	Affy U133A	Validation
91	GSM1012470	GSE41258	Affy U133A	Training
92	GSM1012473	GSE41258	Affy U133A	Training
93	GSM1012474	GSE41258	Affy U133A	Validation
94	GSM1012476	GSE41258	Affy U133A	Training
95	GSM1012480	GSE41258	Affy U133A	Training
96	GSM1012481	GSE41258	Affy U133A	Training
97	GSM1012482	GSE41258	Affy U133A	Training
98	GSM1012483	GSE41258	Affy U133A	Validation
99	GSM1012485	GSE41258	Affy U133A	Training
100	GSM1012488	GSE41258	Affy U133A	Validation
101	GSM1012491	GSE41258	Affy U133A	Training
102	GSM1012495	GSE41258	Affy U133A	Validation
103	GSM1012496	GSE41258	Affy U133A	Validation
104	GSM1012501	GSE41258	Affy U133A	Validation
105	GSM1012505	GSE41258	Affy U133A	Validation
106	GSM1012506	GSE41258	Affy U133A	Validation
107	GSM1012508	GSE41258	Affy U133A	Validation
108	GSM1012510	GSE41258	Affy U133A	Validation
109	GSM1012512	GSE41258	Affy U133A	Training
110	GSM1012519	GSE41258	Affy U133A	Validation
111	GSM1012520	GSE41258	Affy U133A	Training
112	GSM1012521	GSE41258	Affy U133A	Validation
113	GSM1012524	GSE41258	Affy U133A	Validation
114	GSM1012526	GSE41258	Affy U133A	Validation
115	GSM1012527	GSE41258	Affy U133A	Validation
116	GSM1012529	GSE41258	Affy U133A	Validation
117	GSM1012531	GSE41258	Affy U133A	Training
118	GSM1012533	GSE41258	Affy U133A	Training
119	GSM1012535	GSE41258	Affy U133A	Training
120	GSM1012537	GSE41258	Affy U133A	Validation
121	GSM1012539	GSE41258	Affy U133A	Training
122	GSM1012540	GSE41258	Affy U133A	Training
123	GSM1012546	GSE41258	Affy U133A	Training
124	GSM1012548	GSE41258	Affy U133A	Training
125	GSM1012552	GSE41258	Affy U133A	Training
126	GSM1012557	GSE41258	Affy U133A	Training
127	GSM1012558	GSE41258	Affy U133A	Training
128	GSM1012561	GSE41258	Affy U133A	Training
129	GSM1012562	GSE41258	Affy U133A	Validation
130	GSM1012564	GSE41258	Affy U133A	Validation
131	GSM1012566	GSE41258	Affy U133A	Training
132	GSM1012567	GSE41258	Affy U133A	Training
133	GSM1012578	GSE41258	Affy U133A	Training
134	GSM1012581	GSE41258	Affy U133A	Training
135	GSM1012582	GSE41258	Affy U133A	Validation
136	GSM1012583	GSE41258	Affy U133A	Training
137	GSM1012586	GSE41258	Affy U133A	Training
138	GSM1012587	GSE41258	Affy U133A	Validation
139	GSM1012589	GSE41258	Affy U133A	Training
140	GSM1012590	GSE41258	Affy U133A	Validation
141	GSM1012592	GSE41258	Affy U133A	Training
142	GSM1012597	GSE41258	Affy U133A	Validation
143	GSM1012598	GSE41258	Affy U133A	Training
144	GSM1012600	GSE41258	Affy U133A	Validation
145	GSM1012601	GSE41258	Affy U133A	Validation
146	GSM1012602	GSE41258	Affy U133A	Validation
147	GSM1012604	GSE41258	Affy U133A	Training
148	GSM1012606	GSE41258	Affy U133A	Training
149	GSM1012608	GSE41258	Affy U133A	Training
150	GSM1012610	GSE41258	Affy U133A	Validation
151	GSM1012611	GSE41258	Affy U133A	Validation
152	GSM1012614	GSE41258	Affy U133A	Training
153	GSM1012616	GSE41258	Affy U133A	Training
154	GSM1012618	GSE41258	Affy U133A	Training
155	GSM1012621	GSE41258	Affy U133A	Training
156	GSM1012623	GSE41258	Affy U133A	Training
157	GSM1012630	GSE41258	Affy U133A	Training
158	GSM1012640	GSE41258	Affy U133A	Validation
159	GSM1012641	GSE41258	Affy U133A	Validation
160	GSM1012644	GSE41258	Affy U133A	Training
161	GSM1012646	GSE41258	Affy U133A	Validation
162	GSM1012648	GSE41258	Affy U133A	Training
163	GSM1012649	GSE41258	Affy U133A	Training
164	GSM1012650	GSE41258	Affy U133A	Training
165	GSM1012651	GSE41258	Affy U133A	Training
166	GSM1012654	GSE41258	Affy U133A	Training
167	GSM1012656	GSE41258	Affy U133A	Validation
168	GSM1012657	GSE41258	Affy U133A	Validation
169	GSM1012658	GSE41258	Affy U133A	Validation
170	GSM1012661	GSE41258	Affy U133A	Validation
171	GSM1012664	GSE41258	Affy U133A	Validation
172	GSM1012667	GSE41258	Affy U133A	Validation
173	GSM1012278	GSE41258	Affy U133A	Training
174	GSM1012280	GSE41258	Affy U133A	Validation
175	GSM1012281	GSE41258	Affy U133A	Training
176	GSM1012282	GSE41258	Affy U133A	Training
177	GSM1012283	GSE41258	Affy U133A	Validation
178	GSM1012284	GSE41258	Affy U133A	Training
179	GSM1012287	GSE41258	Affy U133A	Training
180	GSM1012290	GSE41258	Affy U133A	Training
181	GSM1012293	GSE41258	Affy U133A	Validation
182	GSM1012294	GSE41258	Affy U133A	Training
183	GSM1012295	GSE41258	Affy U133A	Training
184	GSM1012298	GSE41258	Affy U133A	Training
185	GSM1012301	GSE41258	Affy U133A	Training
186	GSM1012302	GSE41258	Affy U133A	Validation
187	GSM1012304	GSE41258	Affy U133A	Training
188	GSM1012307	GSE41258	Affy U133A	Training
189	GSM1012312	GSE41258	Affy U133A	Training
190	GSM1012314	GSE41258	Affy U133A	Training
191	GSM1012315	GSE41258	Affy U133A	Validation
192	GSM1012317	GSE41258	Affy U133A	Training
193	GSM1012318	GSE41258	Affy U133A	Training
194	GSM1012326	GSE41258	Affy U133A	Validation
195	GSM1012330	GSE41258	Affy U133A	Training
196	GSM1012334	GSE41258	Affy U133A	Training
197	GSM1012335	GSE41258	Affy U133A	Training
198	GSM1012337	GSE41258	Affy U133A	Training
199	GSM1012340	GSE41258	Affy U133A	Training
200	GSM1012341	GSE41258	Affy U133A	Training
201	GSM1012342	GSE41258	Affy U133A	Training
202	GSM1012343	GSE41258	Affy U133A	Validation
203	GSM1012344	GSE41258	Affy U133A	Training
204	GSM1012347	GSE41258	Affy U133A	Validation
205	GSM1012349	GSE41258	Affy U133A	Training
206	GSM1012350	GSE41258	Affy U133A	Validation
207	GSM1012351	GSE41258	Affy U133A	Training
208	GSM1012353	GSE41258	Affy U133A	Validation
209	GSM1012355	GSE41258	Affy U133A	Training
210	GSM1012357	GSE41258	Affy U133A	Validation
211	GSM1012358	GSE41258	Affy U133A	Validation
212	GSM1012360	GSE41258	Affy U133A	Training
213	GSM1012367	GSE41258	Affy U133A	Validation
214	GSM1012370	GSE41258	Affy U133A	Training
215	GSM1012374	GSE41258	Affy U133A	Validation
216	GSM1012375	GSE41258	Affy U133A	Validation
217	GSM1012380	GSE41258	Affy U133A	Validation
218	GSM1012384	GSE41258	Affy U133A	Validation
219	GSM1012388	GSE41258	Affy U133A	Validation
220	GSM1012392	GSE41258	Affy U133A	Training
221	GSM1012395	GSE41258	Affy U133A	Validation
222	GSM1012396	GSE41258	Affy U133A	Validation
223	GSM1012397	GSE41258	Affy U133A	Training
224	GSM1012400	GSE41258	Affy U133A	Training
225	GSM1012402	GSE41258	Affy U133A	Validation
226	GSM1012406	GSE41258	Affy U133A	Training
227	GSM1012408	GSE41258	Affy U133A	Training
228	GSM1012409	GSE41258	Affy U133A	Validation
229	GSM1012412	GSE41258	Affy U133A	Training
230	GSM1012413	GSE41258	Affy U133A	Training
231	GSM1012418	GSE41258	Affy U133A	Training
232	GSM1012419	GSE41258	Affy U133A	Validation
233	GSM1012423	GSE41258	Affy U133A	Training
234	GSM1012427	GSE41258	Affy U133A	Validation
235	GSM1012428	GSE41258	Affy U133A	Training
236	GSM1012429	GSE41258	Affy U133A	Validation
237	GSM1012430	GSE41258	Affy U133A	Training
238	GSM1012431	GSE41258	Affy U133A	Training
239	GSM1012433	GSE41258	Affy U133A	Validation
240	GSM1012434	GSE41258	Affy U133A	Training
241	GSM1012439	GSE41258	Affy U133A	Training
242	GSM1012442	GSE41258	Affy U133A	Validation
243	GSM1012444	GSE41258	Affy U133A	Validation
244	GSM1012446	GSE41258	Affy U133A	Validation
245	GSM1012449	GSE41258	Affy U133A	Validation
246	GSM1012450	GSE41258	Affy U133A	Validation
247	GSM1012453	GSE41258	Affy U133A	Training
248	GSM1012456	GSE41258	Affy U133A	Training
249	GSM1012457	GSE41258	Affy U133A	Validation
250	GSM1012460	GSE41258	Affy U133A	Training
251	GSM1012462	GSE41258	Affy U133A	Training
252	GSM1012463	GSE41258	Affy U133A	Validation
253	GSM1012464	GSE41258	Affy U133A	Training
254	GSM1012469	GSE41258	Affy U133A	Training
255	GSM1012471	GSE41258	Affy U133A	Validation
256	GSM1012472	GSE41258	Affy U133A	Validation
257	GSM1012475	GSE41258	Affy U133A	Training
258	GSM1012477	GSE41258	Affy U133A	Training
259	GSM1012478	GSE41258	Affy U133A	Training
260	GSM1012484	GSE41258	Affy U133A	Training
261	GSM1012486	GSE41258	Affy U133A	Training
262	GSM1012487	GSE41258	Affy U133A	Training
263	GSM1012489	GSE41258	Affy U133A	Training
264	GSM1012490	GSE41258	Affy U133A	Validation
265	GSM1012492	GSE41258	Affy U133A	Training
266	GSM1012493	GSE41258	Affy U133A	Training
267	GSM1012494	GSE41258	Affy U133A	Training
268	GSM1012497	GSE41258	Affy U133A	Training
269	GSM1012498	GSE41258	Affy U133A	Validation
270	GSM1012500	GSE41258	Affy U133A	Validation
271	GSM1012503	GSE41258	Affy U133A	Validation
272	GSM1012504	GSE41258	Affy U133A	Validation
273	GSM1012509	GSE41258	Affy U133A	Training
274	GSM1012511	GSE41258	Affy U133A	Training
275	GSM1012513	GSE41258	Affy U133A	Validation
276	GSM1012514	GSE41258	Affy U133A	Training
277	GSM1012515	GSE41258	Affy U133A	Validation
278	GSM1012516	GSE41258	Affy U133A	Training
279	GSM1012517	GSE41258	Affy U133A	Training
280	GSM1012523	GSE41258	Affy U133A	Validation
281	GSM1012525	GSE41258	Affy U133A	Validation
282	GSM1012528	GSE41258	Affy U133A	Validation
283	GSM1012530	GSE41258	Affy U133A	Validation
284	GSM1012534	GSE41258	Affy U133A	Validation
285	GSM1012536	GSE41258	Affy U133A	Training
286	GSM1012541	GSE41258	Affy U133A	Validation
287	GSM1012542	GSE41258	Affy U133A	Training
288	GSM1012543	GSE41258	Affy U133A	Training
289	GSM1012544	GSE41258	Affy U133A	Training
290	GSM1012545	GSE41258	Affy U133A	Validation
291	GSM1012547	GSE41258	Affy U133A	Validation
292	GSM1012551	GSE41258	Affy U133A	Validation
293	GSM1012553	GSE41258	Affy U133A	Training
294	GSM1012554	GSE41258	Affy U133A	Validation
295	GSM1012555	GSE41258	Affy U133A	Training
296	GSM1012556	GSE41258	Affy U133A	Training
297	GSM1012559	GSE41258	Affy U133A	Validation
298	GSM1012560	GSE41258	Affy U133A	Validation
299	GSM1012563	GSE41258	Affy U133A	Training
300	GSM1012565	GSE41258	Affy U133A	Training
301	GSM1012568	GSE41258	Affy U133A	Validation
302	GSM1012569	GSE41258	Affy U133A	Training
303	GSM1012570	GSE41258	Affy U133A	Training
304	GSM1012571	GSE41258	Affy U133A	Validation
305	GSM1012572	GSE41258	Affy U133A	Validation
306	GSM1012574	GSE41258	Affy U133A	Validation
307	GSM1012575	GSE41258	Affy U133A	Validation
308	GSM1012577	GSE41258	Affy U133A	Training
309	GSM1012579	GSE41258	Affy U133A	Validation
310	GSM1012580	GSE41258	Affy U133A	Validation
311	GSM1012584	GSE41258	Affy U133A	Validation
312	GSM1012585	GSE41258	Affy U133A	Validation
313	GSM1012593	GSE41258	Affy U133A	Validation
314	GSM1012596	GSE41258	Affy U133A	Validation
315	GSM1012599	GSE41258	Affy U133A	Training
316	GSM1012603	GSE41258	Affy U133A	Training
317	GSM1012605	GSE41258	Affy U133A	Training
318	GSM1012607	GSE41258	Affy U133A	Validation
319	GSM1012609	GSE41258	Affy U133A	Training
320	GSM1012612	GSE41258	Affy U133A	Training
321	GSM1012615	GSE41258	Affy U133A	Validation
322	GSM1012622	GSE41258	Affy U133A	Training
323	GSM1012625	GSE41258	Affy U133A	Validation
324	GSM1012626	GSE41258	Affy U133A	Validation
325	GSM1012627	GSE41258	Affy U133A	Training
326	GSM1012629	GSE41258	Affy U133A	Training
327	GSM1012632	GSE41258	Affy U133A	Validation
328	GSM1012633	GSE41258	Affy U133A	Training
329	GSM1012634	GSE41258	Affy U133A	Training
330	GSM1012636	GSE41258	Affy U133A	Validation
331	GSM1012637	GSE41258	Affy U133A	Training
332	GSM1012638	GSE41258	Affy U133A	Training
333	GSM1012639	GSE41258	Affy U133A	Training
334	GSM1012643	GSE41258	Affy U133A	Training
335	GSM1012645	GSE41258	Affy U133A	Training
336	GSM1012652	GSE41258	Affy U133A	Training
337	GSM1012655	GSE41258	Affy U133A	Validation
338	GSM1012659	GSE41258	Affy U133A	Training
339	GSM1012660	GSE41258	Affy U133A	Validation
340	GSM1012662	GSE41258	Affy U133A	Validation
341	GSM1012666	GSE41258	Affy U133A	Validation
342	GSM971957	GSE39582	Affy U133plus2	Training
343	GSM971962	GSE39582	Affy U133plus2	Validation
344	GSM971963	GSE39582	Affy U133plus2	Validation
345	GSM971965	GSE39582	Affy U133plus2	Validation
346	GSM971970	GSE39582	Affy U133plus2	Training
347	GSM971971	GSE39582	Affy U133plus2	Training
348	GSM971972	GSE39582	Affy U133plus2	Validation
349	GSM971976	GSE39582	Affy U133plus2	Validation
350	GSM971978	GSE39582	Affy U133plus2	Training
351	GSM971980	GSE39582	Affy U133plus2	Validation
352	GSM971983	GSE39582	Affy U133plus2	Validation
353	GSM971984	GSE39582	Affy U133plus2	Training
354	GSM971987	GSE39582	Affy U133plus2	Validation
355	GSM971988	GSE39582	Affy U133plus2	Validation
356	GSM971990	GSE39582	Affy U133plus2	Validation
357	GSM971991	GSE39582	Affy U133plus2	Training
358	GSM971992	GSE39582	Affy U133plus2	Validation
359	GSM971998	GSE39582	Affy U133plus2	Validation
360	GSM971999	GSE39582	Affy U133plus2	Validation
361	GSM972000	GSE39582	Affy U133plus2	Validation
362	GSM972002	GSE39582	Affy U133plus2	Training
363	GSM972006	GSE39582	Affy U133plus2	Validation
364	GSM972007	GSE39582	Affy U133plus2	Training
365	GSM972009	GSE39582	Affy U133plus2	Validation
366	GSM972011	GSE39582	Affy U133plus2	Training
367	GSM972012	GSE39582	Affy U133plus2	Validation
368	GSM972015	GSE39582	Affy U133plus2	Validation
369	GSM972016	GSE39582	Affy U133plus2	Validation
370	GSM972020	GSE39582	Affy U133plus2	Training
371	GSM972022	GSE39582	Affy U133plus2	Training
372	GSM972026	GSE39582	Affy U133plus2	Training
373	GSM972029	GSE39582	Affy U133plus2	Training
374	GSM972030	GSE39582	Affy U133plus2	Training
375	GSM972035	GSE39582	Affy U133plus2	Training
376	GSM972036	GSE39582	Affy U133plus2	Validation
377	GSM972040	GSE39582	Affy U133plus2	Validation
378	GSM972041	GSE39582	Affy U133plus2	Validation
379	GSM972043	GSE39582	Affy U133plus2	Training
380	GSM972046	GSE39582	Affy U133plus2	Validation
381	GSM972051	GSE39582	Affy U133plus2	Training
382	GSM972053	GSE39582	Affy U133plus2	Validation
383	GSM972055	GSE39582	Affy U133plus2	Validation
384	GSM972058	GSE39582	Affy U133plus2	Validation
385	GSM972063	GSE39582	Affy U133plus2	Validation
386	GSM972065	GSE39582	Affy U133plus2	Validation
387	GSM972068	GSE39582	Affy U133plus2	Training
388	GSM972069	GSE39582	Affy U133plus2	Validation
389	GSM972071	GSE39582	Affy U133plus2	Validation
390	GSM972073	GSE39582	Affy U133plus2	Training
391	GSM972075	GSE39582	Affy U133plus2	Validation
392	GSM972076	GSE39582	Affy U133plus2	Validation
393	GSM972077	GSE39582	Affy U133plus2	Validation
394	GSM972079	GSE39582	Affy U133plus2	Validation
395	GSM972084	GSE39582	Affy U133plus2	Validation
396	GSM972086	GSE39582	Affy U133plus2	Validation
397	GSM972088	GSE39582	Affy U133plus2	Validation
398	GSM972089	GSE39582	Affy U133plus2	Validation
399	GSM972090	GSE39582	Affy U133plus2	Validation
400	GSM972093	GSE39582	Affy U133plus2	Training
401	GSM972094	GSE39582	Affy U133plus2	Training
402	GSM972097	GSE39582	Affy U133plus2	Training
403	GSM972098	GSE39582	Affy U133plus2	Validation
404	GSM972099	GSE39582	Affy U133plus2	Validation
405	GSM972100	GSE39582	Affy U133plus2	Training
406	GSM972102	GSE39582	Affy U133plus2	Training
407	GSM972107	GSE39582	Affy U133plus2	Validation
408	GSM972112	GSE39582	Affy U133plus2	Validation
409	GSM972113	GSE39582	Affy U133plus2	Validation
410	GSM972115	GSE39582	Affy U133plus2	Validation
411	GSM972120	GSE39582	Affy U133plus2	Validation
412	GSM972122	GSE39582	Affy U133plus2	Validation
413	GSM972124	GSE39582	Affy U133plus2	Training
414	GSM972125	GSE39582	Affy U133plus2	Validation
415	GSM972128	GSE39582	Affy U133plus2	Training
416	GSM972130	GSE39582	Affy U133plus2	Training
417	GSM972133	GSE39582	Affy U133plus2	Training
418	GSM972134	GSE39582	Affy U133plus2	Validation
419	GSM972138	GSE39582	Affy U133plus2	Validation
420	GSM972143	GSE39582	Affy U133plus2	Training
421	GSM972145	GSE39582	Affy U133plus2	Training
422	GSM972147	GSE39582	Affy U133plus2	Validation
423	GSM972150	GSE39582	Affy U133plus2	Validation
424	GSM972153	GSE39582	Affy U133plus2	Validation
425	GSM972154	GSE39582	Affy U133plus2	Training
426	GSM972157	GSE39582	Affy U133plus2	Validation
427	GSM972159	GSE39582	Affy U133plus2	Validation
428	GSM972161	GSE39582	Affy U133plus2	Training
429	GSM972165	GSE39582	Affy U133plus2	Training
430	GSM972166	GSE39582	Affy U133plus2	Validation
431	GSM972167	GSE39582	Affy U133plus2	Training
432	GSM972171	GSE39582	Affy U133plus2	Training
433	GSM972172	GSE39582	Affy U133plus2	Validation
434	GSM972175	GSE39582	Affy U133plus2	Validation
435	GSM972176	GSE39582	Affy U133plus2	Validation
436	GSM972181	GSE39582	Affy U133plus2	Validation
437	GSM972182	GSE39582	Affy U133plus2	Validation
438	GSM972183	GSE39582	Affy U133plus2	Training
439	GSM972188	GSE39582	Affy U133plus2	Training
440	GSM972195	GSE39582	Affy U133plus2	Training
441	GSM972196	GSE39582	Affy U133plus2	Training
442	GSM972197	GSE39582	Affy U133plus2	Training
443	GSM972200	GSE39582	Affy U133plus2	Validation
444	GSM972201	GSE39582	Affy U133plus2	Validation
445	GSM972209	GSE39582	Affy U133plus2	Training
446	GSM972210	GSE39582	Affy U133plus2	Training
447	GSM972214	GSE39582	Affy U133plus2	Training
448	GSM972218	GSE39582	Affy U133plus2	Training
449	GSM972219	GSE39582	Affy U133plus2	Training
450	GSM972221	GSE39582	Affy U133plus2	Validation
451	GSM972226	GSE39582	Affy U133plus2	Validation
452	GSM972228	GSE39582	Affy U133plus2	Validation
453	GSM972229	GSE39582	Affy U133plus2	Validation
454	GSM972230	GSE39582	Affy U133plus2	Training
455	GSM972231	GSE39582	Affy U133plus2	Validation
456	GSM972232	GSE39582	Affy U133plus2	Validation
457	GSM972235	GSE39582	Affy U133plus2	Training
458	GSM972236	GSE39582	Affy U133plus2	Training
459	GSM972237	GSE39582	Affy U133plus2	Validation
460	GSM972244	GSE39582	Affy U133plus2	Validation
461	GSM972245	GSE39582	Affy U133plus2	Validation
462	GSM972254	GSE39582	Affy U133plus2	Training
463	GSM972258	GSE39582	Affy U133plus2	Validation
464	GSM972261	GSE39582	Affy U133plus2	Training
465	GSM972262	GSE39582	Affy U133plus2	Validation
466	GSM972264	GSE39582	Affy U133plus2	Training
467	GSM972266	GSE39582	Affy U133plus2	Validation
468	GSM972267	GSE39582	Affy U133plus2	Training
469	GSM972268	GSE39582	Affy U133plus2	Validation
470	GSM972269	GSE39582	Affy U133plus2	Training
471	GSM972276	GSE39582	Affy U133plus2	Validation
472	GSM972277	GSE39582	Affy U133plus2	Training
473	GSM972279	GSE39582	Affy U133plus2	Training
474	GSM972281	GSE39582	Affy U133plus2	Training
475	GSM972286	GSE39582	Affy U133plus2	Validation
476	GSM972288	GSE39582	Affy U133plus2	Training
477	GSM972289	GSE39582	Affy U133plus2	Validation
478	GSM972292	GSE39582	Affy U133plus2	Training
479	GSM972295	GSE39582	Affy U133plus2	Training
480	GSM972298	GSE39582	Affy U133plus2	Validation
481	GSM972299	GSE39582	Affy U133plus2	Training
482	GSM972300	GSE39582	Affy U133plus2	Training
483	GSM972301	GSE39582	Affy U133plus2	Training
484	GSM972305	GSE39582	Affy U133plus2	Validation
485	GSM972306	GSE39582	Affy U133plus2	Training
486	GSM972308	GSE39582	Affy U133plus2	Training
487	GSM972309	GSE39582	Affy U133plus2	Validation
488	GSM972313	GSE39582	Affy U133plus2	Validation
489	GSM972314	GSE39582	Affy U133plus2	Training
490	GSM972317	GSE39582	Affy U133plus2	Validation
491	GSM972319	GSE39582	Affy U133plus2	Validation
492	GSM972321	GSE39582	Affy U133plus2	Training
493	GSM972323	GSE39582	Affy U133plus2	Training
494	GSM972324	GSE39582	Affy U133plus2	Validation
495	GSM972328	GSE39582	Affy U133plus2	Validation
496	GSM972329	GSE39582	Affy U133plus2	Training
497	GSM972336	GSE39582	Affy U133plus2	Training
498	GSM972337	GSE39582	Affy U133plus2	Validation
499	GSM972338	GSE39582	Affy U133plus2	Training
500	GSM972339	GSE39582	Affy U133plus2	Validation
501	GSM972340	GSE39582	Affy U133plus2	Training
502	GSM972343	GSE39582	Affy U133plus2	Training
503	GSM972344	GSE39582	Affy U133plus2	Validation
504	GSM972345	GSE39582	Affy U133plus2	Validation
505	GSM972347	GSE39582	Affy U133plus2	Validation
506	GSM972348	GSE39582	Affy U133plus2	Training
507	GSM972352	GSE39582	Affy U133plus2	Validation
508	GSM972356	GSE39582	Affy U133plus2	Training
509	GSM972357	GSE39582	Affy U133plus2	Training
510	GSM972358	GSE39582	Affy U133plus2	Training
511	GSM972359	GSE39582	Affy U133plus2	Training
512	GSM972360	GSE39582	Affy U133plus2	Training
513	GSM972363	GSE39582	Affy U133plus2	Training
514	GSM972366	GSE39582	Affy U133plus2	Validation
515	GSM972367	GSE39582	Affy U133plus2	Validation
516	GSM972368	GSE39582	Affy U133plus2	Training
517	GSM972369	GSE39582	Affy U133plus2	Validation
518	GSM972370	GSE39582	Affy U133plus2	Validation
519	GSM972375	GSE39582	Affy U133plus2	Training
520	GSM972376	GSE39582	Affy U133plus2	Training
521	GSM972377	GSE39582	Affy U133plus2	Training
522	GSM972379	GSE39582	Affy U133plus2	Training
523	GSM972383	GSE39582	Affy U133plus2	Training
524	GSM972384	GSE39582	Affy U133plus2	Training
525	GSM972386	GSE39582	Affy U133plus2	Validation
526	GSM972388	GSE39582	Affy U133plus2	Validation
527	GSM972391	GSE39582	Affy U133plus2	Validation
528	GSM972392	GSE39582	Affy U133plus2	Validation
529	GSM972393	GSE39582	Affy U133plus2	Validation
530	GSM972397	GSE39582	Affy U133plus2	Training
531	GSM972399	GSE39582	Affy U133plus2	Training
532	GSM972402	GSE39582	Affy U133plus2	Training
533	GSM972403	GSE39582	Affy U133plus2	Training
534	GSM972404	GSE39582	Affy U133plus2	Training
535	GSM972408	GSE39582	Affy U133plus2	Validation
536	GSM972409	GSE39582	Affy U133plus2	Training
537	GSM972410	GSE39582	Affy U133plus2	Training
538	GSM972412	GSE39582	Affy U133plus2	Validation
539	GSM972413	GSE39582	Affy U133plus2	Training
540	GSM972415	GSE39582	Affy U133plus2	Training
541	GSM972416	GSE39582	Affy U133plus2	Validation
542	GSM972417	GSE39582	Affy U133plus2	Training
543	GSM972419	GSE39582	Affy U133plus2	Validation
544	GSM972422	GSE39582	Affy U133plus2	Validation
545	GSM972425	GSE39582	Affy U133plus2	Validation
546	GSM972426	GSE39582	Affy U133plus2	Training
547	GSM972428	GSE39582	Affy U133plus2	Training
548	GSM972430	GSE39582	Affy U133plus2	Training
549	GSM972433	GSE39582	Affy U133plus2	Validation
550	GSM972434	GSE39582	Affy U133plus2	Training
551	GSM972435	GSE39582	Affy U133plus2	Validation
552	GSM972438	GSE39582	Affy U133plus2	Validation
553	GSM972439	GSE39582	Affy U133plus2	Training
554	GSM972443	GSE39582	Affy U133plus2	Training
555	GSM972448	GSE39582	Affy U133plus2	Training
556	GSM972450	GSE39582	Affy U133plus2	Training
557	GSM972452	GSE39582	Affy U133plus2	Validation
558	GSM972456	GSE39582	Affy U133plus2	Validation
559	GSM972457	GSE39582	Affy U133plus2	Training
560	GSM972458	GSE39582	Affy U133plus2	Validation
561	GSM972459	GSE39582	Affy U133plus2	Training
562	GSM972460	GSE39582	Affy U133plus2	Training
563	GSM972461	GSE39582	Affy U133plus2	Validation
564	GSM972463	GSE39582	Affy U133plus2	Validation
565	GSM972465	GSE39582	Affy U133plus2	Training
566	GSM972467	GSE39582	Affy U133plus2	Validation
567	GSM972469	GSE39582	Affy U133plus2	Training
568	GSM972474	GSE39582	Affy U133plus2	Training
569	GSM972482	GSE39582	Affy U133plus2	Training
570	GSM972483	GSE39582	Affy U133plus2	Validation
571	GSM972484	GSE39582	Affy U133plus2	Validation
572	GSM972487	GSE39582	Affy U133plus2	Training
573	GSM972488	GSE39582	Affy U133plus2	Training
574	GSM972494	GSE39582	Affy U133plus2	Training
575	GSM972495	GSE39582	Affy U133plus2	Training
576	GSM972496	GSE39582	Affy U133plus2	Validation
577	GSM972500	GSE39582	Affy U133plus2	Training
578	GSM972501	GSE39582	Affy U133plus2	Validation
579	GSM972502	GSE39582	Affy U133plus2	Training
580	GSM972503	GSE39582	Affy U133plus2	Validation
581	GSM972504	GSE39582	Affy U133plus2	Validation
582	GSM972506	GSE39582	Affy U133plus2	Validation
583	GSM972510	GSE39582	Affy U133plus2	Validation
584	GSM972511	GSE39582	Affy U133plus2	Training
585	GSM972512	GSE39582	Affy U133plus2	Validation
586	GSM972514	GSE39582	Affy U133plus2	Training
587	GSM972516	GSE39582	Affy U133plus2	Training
588	GSM972517	GSE39582	Affy U133plus2	Validation
589	GSM972518	GSE39582	Affy U133plus2	Validation
590	GSM972520	GSE39582	Affy U133plus2	Training
591	GSM972522	GSE39582	Affy U133plus2	Validation
592	GSM1681356	GSE39582	Affy U133plus2	Validation
593	GSM1681357	GSE39582	Affy U133plus2	Training
594	GSM1681359	GSE39582	Affy U133plus2	Validation
595	GSM1681360	GSE39582	Affy U133plus2	Training
596	GSM1681361	GSE39582	Affy U133plus2	Validation
597	GSM1681363	GSE39582	Affy U133plus2	Training
598	GSM1681366	GSE39582	Affy U133plus2	Validation
599	GSM1681370	GSE39582	Affy U133plus2	Validation
600	GSM1681371	GSE39582	Affy U133plus2	Training
601	GSM971958	GSE39582	Affy U133plus2	Training
602	GSM971959	GSE39582	Affy U133plus2	Validation
603	GSM971960	GSE39582	Affy U133plus2	Validation
604	GSM971961	GSE39582	Affy U133plus2	Training
605	GSM971966	GSE39582	Affy U133plus2	Training
606	GSM971967	GSE39582	Affy U133plus2	Validation
607	GSM971968	GSE39582	Affy U133plus2	Validation
608	GSM971973	GSE39582	Affy U133plus2	Training
609	GSM971975	GSE39582	Affy U133plus2	Training
610	GSM971979	GSE39582	Affy U133plus2	Validation
611	GSM971981	GSE39582	Affy U133plus2	Training
612	GSM971982	GSE39582	Affy U133plus2	Validation
613	GSM971985	GSE39582	Affy U133plus2	Training
614	GSM971986	GSE39582	Affy U133plus2	Validation
615	GSM971989	GSE39582	Affy U133plus2	Training
616	GSM971994	GSE39582	Affy U133plus2	Training
617	GSM971995	GSE39582	Affy U133plus2	Training
618	GSM972001	GSE39582	Affy U133plus2	Validation
619	GSM972003	GSE39582	Affy U133plus2	Training
620	GSM972004	GSE39582	Affy U133plus2	Validation
621	GSM972008	GSE39582	Affy U133plus2	Training
622	GSM972010	GSE39582	Affy U133plus2	Validation
623	GSM972014	GSE39582	Affy U133plus2	Training
624	GSM972017	GSE39582	Affy U133plus2	Training
625	GSM972018	GSE39582	Affy U133plus2	Training
626	GSM972019	GSE39582	Affy U133plus2	Validation
627	GSM972021	GSE39582	Affy U133plus2	Training
628	GSM972023	GSE39582	Affy U133plus2	Validation
629	GSM972024	GSE39582	Affy U133plus2	Validation
630	GSM972025	GSE39582	Affy U133plus2	Validation
631	GSM972027	GSE39582	Affy U133plus2	Training
632	GSM972028	GSE39582	Affy U133plus2	Validation
633	GSM972031	GSE39582	Affy U133plus2	Validation
634	GSM972033	GSE39582	Affy U133plus2	Training
635	GSM972037	GSE39582	Affy U133plus2	Training
636	GSM972038	GSE39582	Affy U133plus2	Training
637	GSM972039	GSE39582	Affy U133plus2	Training
638	GSM972042	GSE39582	Affy U133plus2	Validation
639	GSM972044	GSE39582	Affy U133plus2	Training
640	GSM972045	GSE39582	Affy U133plus2	Training
641	GSM972047	GSE39582	Affy U133plus2	Training
642	GSM972048	GSE39582	Affy U133plus2	Training
643	GSM972049	GSE39582	Affy U133plus2	Validation
644	GSM972052	GSE39582	Affy U133plus2	Training
645	GSM972054	GSE39582	Affy U133plus2	Training
646	GSM972056	GSE39582	Affy U133plus2	Validation
647	GSM972059	GSE39582	Affy U133plus2	Validation
648	GSM972060	GSE39582	Affy U133plus2	Training
649	GSM972061	GSE39582	Affy U133plus2	Validation
650	GSM972062	GSE39582	Affy U133plus2	Training
651	GSM972064	GSE39582	Affy U133plus2	Training
652	GSM972067	GSE39582	Affy U133plus2	Validation
653	GSM972070	GSE39582	Affy U133plus2	Validation
654	GSM972072	GSE39582	Affy U133plus2	Training
655	GSM972074	GSE39582	Affy U133plus2	Training
656	GSM972078	GSE39582	Affy U133plus2	Validation
657	GSM972080	GSE39582	Affy U133plus2	Training
658	GSM972082	GSE39582	Affy U133plus2	Validation
659	GSM972083	GSE39582	Affy U133plus2	Training
660	GSM972085	GSE39582	Affy U133plus2	Validation
661	GSM972091	GSE39582	Affy U133plus2	Validation
662	GSM972092	GSE39582	Affy U133plus2	Validation
663	GSM972095	GSE39582	Affy U133plus2	Training
664	GSM972096	GSE39582	Affy U133plus2	Training
665	GSM972101	GSE39582	Affy U133plus2	Validation
666	GSM972103	GSE39582	Affy U133plus2	Training
667	GSM972104	GSE39582	Affy U133plus2	Training
668	GSM972105	GSE39582	Affy U133plus2	Training
669	GSM972106	GSE39582	Affy U133plus2	Training
670	GSM972109	GSE39582	Affy U133plus2	Validation
671	GSM972110	GSE39582	Affy U133plus2	Training
672	GSM972111	GSE39582	Affy U133plus2	Validation
673	GSM972114	GSE39582	Affy U133plus2	Validation
674	GSM972117	GSE39582	Affy U133plus2	Validation
675	GSM972118	GSE39582	Affy U133plus2	Validation
676	GSM972119	GSE39582	Affy U133plus2	Training
677	GSM972121	GSE39582	Affy U133plus2	Training
678	GSM972123	GSE39582	Affy U133plus2	Validation
679	GSM972127	GSE39582	Affy U133plus2	Validation
680	GSM972129	GSE39582	Affy U133plus2	Training
681	GSM972131	GSE39582	Affy U133plus2	Validation
682	GSM972132	GSE39582	Affy U133plus2	Training
683	GSM972135	GSE39582	Affy U133plus2	Training
684	GSM972136	GSE39582	Affy U133plus2	Training
685	GSM972137	GSE39582	Affy U133plus2	Validation
686	GSM972139	GSE39582	Affy U133plus2	Validation
687	GSM972141	GSE39582	Affy U133plus2	Training
688	GSM972142	GSE39582	Affy U133plus2	Validation
689	GSM972144	GSE39582	Affy U133plus2	Training
690	GSM972146	GSE39582	Affy U133plus2	Validation
691	GSM972148	GSE39582	Affy U133plus2	Training
692	GSM972149	GSE39582	Affy U133plus2	Training
693	GSM972151	GSE39582	Affy U133plus2	Validation
694	GSM972152	GSE39582	Affy U133plus2	Validation
695	GSM972155	GSE39582	Affy U133plus2	Validation
696	GSM972156	GSE39582	Affy U133plus2	Validation
697	GSM972158	GSE39582	Affy U133plus2	Validation
698	GSM972160	GSE39582	Affy U133plus2	Training
699	GSM972162	GSE39582	Affy U133plus2	Validation
700	GSM972163	GSE39582	Affy U133plus2	Validation
701	GSM972164	GSE39582	Affy U133plus2	Validation
702	GSM972168	GSE39582	Affy U133plus2	Validation
703	GSM972169	GSE39582	Affy U133plus2	Validation
704	GSM972170	GSE39582	Affy U133plus2	Training
705	GSM972173	GSE39582	Affy U133plus2	Training
706	GSM972174	GSE39582	Affy U133plus2	Validation
707	GSM972178	GSE39582	Affy U133plus2	Training
708	GSM972179	GSE39582	Affy U133plus2	Training
709	GSM972184	GSE39582	Affy U133plus2	Training
710	GSM972185	GSE39582	Affy U133plus2	Training
711	GSM972186	GSE39582	Affy U133plus2	Validation
712	GSM972187	GSE39582	Affy U133plus2	Training
713	GSM972190	GSE39582	Affy U133plus2	Validation
714	GSM972191	GSE39582	Affy U133plus2	Training
715	GSM972193	GSE39582	Affy U133plus2	Validation
716	GSM972194	GSE39582	Affy U133plus2	Validation
717	GSM972198	GSE39582	Affy U133plus2	Training
718	GSM972199	GSE39582	Affy U133plus2	Validation
719	GSM972202	GSE39582	Affy U133plus2	Validation
720	GSM972203	GSE39582	Affy U133plus2	Validation
721	GSM972204	GSE39582	Affy U133plus2	Training
722	GSM972205	GSE39582	Affy U133plus2	Validation
723	GSM972207	GSE39582	Affy U133plus2	Validation
724	GSM972208	GSE39582	Affy U133plus2	Training
725	GSM972211	GSE39582	Affy U133plus2	Training
726	GSM972212	GSE39582	Affy U133plus2	Training
727	GSM972213	GSE39582	Affy U133plus2	Validation
728	GSM972215	GSE39582	Affy U133plus2	Validation
729	GSM972216	GSE39582	Affy U133plus2	Training
730	GSM972217	GSE39582	Affy U133plus2	Validation
731	GSM972220	GSE39582	Affy U133plus2	Training
732	GSM972222	GSE39582	Affy U133plus2	Validation
733	GSM972223	GSE39582	Affy U133plus2	Training
734	GSM972224	GSE39582	Affy U133plus2	Training
735	GSM972227	GSE39582	Affy U133plus2	Validation
736	GSM972238	GSE39582	Affy U133plus2	Training
737	GSM972239	GSE39582	Affy U133plus2	Validation
738	GSM972240	GSE39582	Affy U133plus2	Training
739	GSM972242	GSE39582	Affy U133plus2	Training
740	GSM972243	GSE39582	Affy U133plus2	Training
741	GSM972246	GSE39582	Affy U133plus2	Training
742	GSM972247	GSE39582	Affy U133plus2	Training
743	GSM972248	GSE39582	Affy U133plus2	Validation
744	GSM972250	GSE39582	Affy U133plus2	Validation
745	GSM972251	GSE39582	Affy U133plus2	Validation
746	GSM972252	GSE39582	Affy U133plus2	Validation
747	GSM972255	GSE39582	Affy U133plus2	Validation
748	GSM972257	GSE39582	Affy U133plus2	Validation
749	GSM972259	GSE39582	Affy U133plus2	Training
750	GSM972260	GSE39582	Affy U133plus2	Validation
751	GSM972265	GSE39582	Affy U133plus2	Training
752	GSM972270	GSE39582	Affy U133plus2	Training
753	GSM972271	GSE39582	Affy U133plus2	Validation
754	GSM972272	GSE39582	Affy U133plus2	Validation
755	GSM972273	GSE39582	Affy U133plus2	Validation
756	GSM972274	GSE39582	Affy U133plus2	Validation
757	GSM972275	GSE39582	Affy U133plus2	Validation
758	GSM972278	GSE39582	Affy U133plus2	Training
759	GSM972282	GSE39582	Affy U133plus2	Training
760	GSM972283	GSE39582	Affy U133plus2	Validation
761	GSM972285	GSE39582	Affy U133plus2	Validation
762	GSM972287	GSE39582	Affy U133plus2	Training
763	GSM972290	GSE39582	Affy U133plus2	Validation
764	GSM972291	GSE39582	Affy U133plus2	Training
765	GSM972293	GSE39582	Affy U133plus2	Validation
766	GSM972294	GSE39582	Affy U133plus2	Validation
767	GSM972296	GSE39582	Affy U133plus2	Validation
768	GSM972297	GSE39582	Affy U133plus2	Training
769	GSM972302	GSE39582	Affy U133plus2	Validation
770	GSM972303	GSE39582	Affy U133plus2	Training
771	GSM972307	GSE39582	Affy U133plus2	Training
772	GSM972310	GSE39582	Affy U133plus2	Training
773	GSM972311	GSE39582	Affy U133plus2	Validation
774	GSM972312	GSE39582	Affy U133plus2	Validation
775	GSM972316	GSE39582	Affy U133plus2	Validation
776	GSM972318	GSE39582	Affy U133plus2	Validation
777	GSM972320	GSE39582	Affy U133plus2	Training
778	GSM972322	GSE39582	Affy U133plus2	Training
779	GSM972325	GSE39582	Affy U133plus2	Training
780	GSM972326	GSE39582	Affy U133plus2	Training
781	GSM972330	GSE39582	Affy U133plus2	Validation
782	GSM972332	GSE39582	Affy U133plus2	Validation
783	GSM972335	GSE39582	Affy U133plus2	Training
784	GSM972341	GSE39582	Affy U133plus2	Training
785	GSM972346	GSE39582	Affy U133plus2	Validation
786	GSM972349	GSE39582	Affy U133plus2	Validation
787	GSM972351	GSE39582	Affy U133plus2	Training
788	GSM972353	GSE39582	Affy U133plus2	Training
789	GSM972354	GSE39582	Affy U133plus2	Training
790	GSM972355	GSE39582	Affy U133plus2	Validation
791	GSM972362	GSE39582	Affy U133plus2	Training
792	GSM972372	GSE39582	Affy U133plus2	Training
793	GSM972373	GSE39582	Affy U133plus2	Validation
794	GSM972374	GSE39582	Affy U133plus2	Validation
795	GSM972381	GSE39582	Affy U133plus2	Validation
796	GSM972382	GSE39582	Affy U133plus2	Validation
797	GSM972387	GSE39582	Affy U133plus2	Validation
798	GSM972394	GSE39582	Affy U133plus2	Training
799	GSM972395	GSE39582	Affy U133plus2	Validation
800	GSM972396	GSE39582	Affy U133plus2	Training
801	GSM972398	GSE39582	Affy U133plus2	Validation
802	GSM972400	GSE39582	Affy U133plus2	Training
803	GSM972401	GSE39582	Affy U133plus2	Training
804	GSM972405	GSE39582	Affy U133plus2	Validation
805	GSM972406	GSE39582	Affy U133plus2	Validation
806	GSM972411	GSE39582	Affy U133plus2	Training
807	GSM972414	GSE39582	Affy U133plus2	Training
808	GSM972418	GSE39582	Affy U133plus2	Training
809	GSM972423	GSE39582	Affy U133plus2	Validation
810	GSM972424	GSE39582	Affy U133plus2	Validation
811	GSM972429	GSE39582	Affy U133plus2	Validation
812	GSM972431	GSE39582	Affy U133plus2	Training
813	GSM972432	GSE39582	Affy U133plus2	Validation
814	GSM972436	GSE39582	Affy U133plus2	Training
815	GSM972437	GSE39582	Affy U133plus2	Training
816	GSM972440	GSE39582	Affy U133plus2	Training
817	GSM972441	GSE39582	Affy U133plus2	Training
818	GSM972442	GSE39582	Affy U133plus2	Validation
819	GSM972444	GSE39582	Affy U133plus2	Validation
820	GSM972445	GSE39582	Affy U133plus2	Training
821	GSM972447	GSE39582	Affy U133plus2	Training
822	GSM972449	GSE39582	Affy U133plus2	Validation
823	GSM972451	GSE39582	Affy U133plus2	Training
824	GSM972453	GSE39582	Affy U133plus2	Training
825	GSM972454	GSE39582	Affy U133plus2	Validation
826	GSM972455	GSE39582	Affy U133plus2	Training
827	GSM972462	GSE39582	Affy U133plus2	Training
828	GSM972464	GSE39582	Affy U133plus2	Training
829	GSM972466	GSE39582	Affy U133plus2	Validation
830	GSM972468	GSE39582	Affy U133plus2	Training
831	GSM972470	GSE39582	Affy U133plus2	Training
832	GSM972472	GSE39582	Affy U133plus2	Validation
833	GSM972473	GSE39582	Affy U133plus2	Validation
834	GSM972475	GSE39582	Affy U133plus2	Training
835	GSM972476	GSE39582	Affy U133plus2	Validation
836	GSM972478	GSE39582	Affy U133plus2	Training
837	GSM972479	GSE39582	Affy U133plus2	Validation
838	GSM972480	GSE39582	Affy U133plus2	Training
839	GSM972481	GSE39582	Affy U133plus2	Training
840	GSM972485	GSE39582	Affy U133plus2	Validation
841	GSM972489	GSE39582	Affy U133plus2	Training
842	GSM972492	GSE39582	Affy U133plus2	Validation
843	GSM972497	GSE39582	Affy U133plus2	Validation
844	GSM972498	GSE39582	Affy U133plus2	Training
845	GSM972505	GSE39582	Affy U133plus2	Validation
846	GSM972507	GSE39582	Affy U133plus2	Training
847	GSM972508	GSE39582	Affy U133plus2	Training
848	GSM972509	GSE39582	Affy U133plus2	Training
849	GSM972513	GSE39582	Affy U133plus2	Validation
850	GSM972515	GSE39582	Affy U133plus2	Training
851	GSM972519	GSE39582	Affy U133plus2	Validation
852	GSM972521	GSE39582	Affy U133plus2	Validation
853	GSM1681353	GSE39582	Affy U133plus2	Training
854	GSM1681354	GSE39582	Affy U133plus2	Validation
855	GSM1681355	GSE39582	Affy U133plus2	Training
856	GSM1681358	GSE39582	Affy U133plus2	Training
857	GSM1681364	GSE39582	Affy U133plus2	Validation
858	GSM1681365	GSE39582	Affy U133plus2	Training
859	GSM1681367	GSE39582	Affy U133plus2	Training
860	GSM1681368	GSE39582	Affy U133plus2	Training
861	GSM1681369	GSE39582	Affy U133plus2	Training
862	GSM929494	GSE37892	Affy U133plus2	Validation
863	GSM929495	GSE37892	Affy U133plus2	Validation
864	GSM929498	GSE37892	Affy U133plus2	Validation
865	GSM929502	GSE37892	Affy U133plus2	Validation
866	GSM929504	GSE37892	Affy U133plus2	Validation
867	GSM929508	GSE37892	Affy U133plus2	Training
868	GSM929509	GSE37892	Affy U133plus2	Training
869	GSM929510	GSE37892	Affy U133plus2	Training
870	GSM929513	GSE37892	Affy U133plus2	Validation
871	GSM929516	GSE37892	Affy U133plus2	Validation
872	GSM929518	GSE37892	Affy U133plus2	Training
873	GSM929520	GSE37892	Affy U133plus2	Validation
874	GSM929521	GSE37892	Affy U133plus2	Training
875	GSM929524	GSE37892	Affy U133plus2	Training
876	GSM929526	GSE37892	Affy U133plus2	Training
877	GSM929527	GSE37892	Affy U133plus2	Validation
878	GSM929531	GSE37892	Affy U133plus2	Validation
879	GSM929534	GSE37892	Affy U133plus2	Training
880	GSM929536	GSE37892	Affy U133plus2	Validation
881	GSM929537	GSE37892	Affy U133plus2	Training
882	GSM929540	GSE37892	Affy U133plus2	Training
883	GSM929542	GSE37892	Affy U133plus2	Training
884	GSM929544	GSE37892	Affy U133plus2	Validation
885	GSM929546	GSE37892	Affy U133plus2	Validation
886	GSM929551	GSE37892	Affy U133plus2	Training
887	GSM929555	GSE37892	Affy U133plus2	Training
888	GSM929556	GSE37892	Affy U133plus2	Training
889	GSM929557	GSE37892	Affy U133plus2	Validation
890	GSM929561	GSE37892	Affy U133plus2	Training
891	GSM929565	GSE37892	Affy U133plus2	Validation
892	GSM929567	GSE37892	Affy U133plus2	Training
893	GSM929569	GSE37892	Affy U133plus2	Training
894	GSM929571	GSE37892	Affy U133plus2	Training
895	GSM929572	GSE37892	Affy U133plus2	Training
896	GSM929575	GSE37892	Affy U133plus2	Validation
897	GSM929576	GSE37892	Affy U133plus2	Training
898	GSM929577	GSE37892	Affy U133plus2	Training
899	GSM929579	GSE37892	Affy U133plus2	Training
900	GSM929581	GSE37892	Affy U133plus2	Validation
901	GSM929583	GSE37892	Affy U133plus2	Validation
902	GSM929585	GSE37892	Affy U133plus2	Training
903	GSM929587	GSE37892	Affy U133plus2	Training
904	GSM929588	GSE37892	Affy U133plus2	Training
905	GSM929593	GSE37892	Affy U133plus2	Validation
906	GSM929597	GSE37892	Affy U133plus2	Validation
907	GSM929599	GSE37892	Affy U133plus2	Validation
908	GSM929601	GSE37892	Affy U133plus2	Training
909	GSM929603	GSE37892	Affy U133plus2	Training
910	GSM929604	GSE37892	Affy U133plus2	Validation
911	GSM929607	GSE37892	Affy U133plus2	Training
912	GSM929613	GSE37892	Affy U133plus2	Training
913	GSM929614	GSE37892	Affy U133plus2	Validation
914	GSM929615	GSE37892	Affy U133plus2	Training
915	GSM929616	GSE37892	Affy U133plus2	Validation
916	GSM929618	GSE37892	Affy U133plus2	Training
917	GSM929496	GSE37892	Affy U133plus2	Training
918	GSM929497	GSE37892	Affy U133plus2	Validation
919	GSM929499	GSE37892	Affy U133plus2	Training
920	GSM929500	GSE37892	Affy U133plus2	Training
921	GSM929501	GSE37892	Affy U133plus2	Training
922	GSM929503	GSE37892	Affy U133plus2	Training
923	GSM929505	GSE37892	Affy U133plus2	Training
924	GSM929506	GSE37892	Affy U133plus2	Validation
925	GSM929507	GSE37892	Affy U133plus2	Training
926	GSM929512	GSE37892	Affy U133plus2	Training
927	GSM929514	GSE37892	Affy U133plus2	Training
928	GSM929515	GSE37892	Affy U133plus2	Training
929	GSM929519	GSE37892	Affy U133plus2	Training
930	GSM929522	GSE37892	Affy U133plus2	Validation
931	GSM929523	GSE37892	Affy U133plus2	Training
932	GSM929525	GSE37892	Affy U133plus2	Training
933	GSM929529	GSE37892	Affy U133plus2	Validation
934	GSM929530	GSE37892	Affy U133plus2	Validation
935	GSM929532	GSE37892	Affy U133plus2	Training
936	GSM929533	GSE37892	Affy U133plus2	Validation
937	GSM929535	GSE37892	Affy U133plus2	Training
938	GSM929538	GSE37892	Affy U133plus2	Validation
939	GSM929539	GSE37892	Affy U133plus2	Validation
940	GSM929541	GSE37892	Affy U133plus2	Training
941	GSM929543	GSE37892	Affy U133plus2	Training
942	GSM929545	GSE37892	Affy U133plus2	Training
943	GSM929547	GSE37892	Affy U133plus2	Validation
944	GSM929548	GSE37892	Affy U133plus2	Training
945	GSM929549	GSE37892	Affy U133plus2	Validation
946	GSM929550	GSE37892	Affy U133plus2	Validation
947	GSM929552	GSE37892	Affy U133plus2	Validation
948	GSM929553	GSE37892	Affy U133plus2	Training
949	GSM929554	GSE37892	Affy U133plus2	Training
950	GSM929558	GSE37892	Affy U133plus2	Training
951	GSM929559	GSE37892	Affy U133plus2	Training
952	GSM929560	GSE37892	Affy U133plus2	Validation
953	GSM929562	GSE37892	Affy U133plus2	Training
954	GSM929563	GSE37892	Affy U133plus2	Training
955	GSM929564	GSE37892	Affy U133plus2	Training
956	GSM929566	GSE37892	Affy U133plus2	Training
957	GSM929568	GSE37892	Affy U133plus2	Validation
958	GSM929570	GSE37892	Affy U133plus2	Validation
959	GSM929573	GSE37892	Affy U133plus2	Validation
960	GSM929578	GSE37892	Affy U133plus2	Training
961	GSM929580	GSE37892	Affy U133plus2	Training
962	GSM929582	GSE37892	Affy U133plus2	Training
963	GSM929584	GSE37892	Affy U133plus2	Training
964	GSM929589	GSE37892	Affy U133plus2	Validation
965	GSM929590	GSE37892	Affy U133plus2	Training
966	GSM929591	GSE37892	Affy U133plus2	Training
967	GSM929592	GSE37892	Affy U133plus2	Validation
968	GSM929594	GSE37892	Affy U133plus2	Validation
969	GSM929595	GSE37892	Affy U133plus2	Training
970	GSM929602	GSE37892	Affy U133plus2	Validation
971	GSM929605	GSE37892	Affy U133plus2	Validation
972	GSM929609	GSE37892	Affy U133plus2	Validation
973	GSM929610	GSE37892	Affy U133plus2	Validation
974	GSM929611	GSE37892	Affy U133plus2	Training
975	GSM929617	GSE37892	Affy U133plus2	Validation
976	GSM929619	GSE37892	Affy U133plus2	Training
977	GSM929621	GSE37892	Affy U133plus2	Training
978	GSM929622	GSE37892	Affy U133plus2	Validation
979	GSM929623	GSE37892	Affy U133plus2	Validation
980	GSM734111	GSE29621	Affy U133plus2	Training
981	GSM734112	GSE29621	Affy U133plus2	Validation
982	GSM734113	GSE29621	Affy U133plus2	Validation
983	GSM734116	GSE29621	Affy U133plus2	Validation
984	GSM734117	GSE29621	Affy U133plus2	Training
985	GSM734118	GSE29621	Affy U133plus2	Training
986	GSM734119	GSE29621	Affy U133plus2	Training
987	GSM734120	GSE29621	Affy U133plus2	Training
988	GSM734123	GSE29621	Affy U133plus2	Validation
989	GSM734124	GSE29621	Affy U133plus2	Training
990	GSM734130	GSE29621	Affy U133plus2	Training
991	GSM734131	GSE29621	Affy U133plus2	Validation
992	GSM734134	GSE29621	Affy U133plus2	Validation
993	GSM734135	GSE29621	Affy U133plus2	Training
994	GSM734136	GSE29621	Affy U133plus2	Validation
995	GSM734137	GSE29621	Affy U133plus2	Validation
996	GSM734139	GSE29621	Affy U133plus2	Validation
997	GSM734140	GSE29621	Affy U133plus2	Validation
998	GSM734142	GSE29621	Affy U133plus2	Validation
999	GSM734144	GSE29621	Affy U133plus2	Validation
1000	GSM734148	GSE29621	Affy U133plus2	Training
1001	GSM734150	GSE29621	Affy U133plus2	Validation
1002	GSM734157	GSE29621	Affy U133plus2	Training
1003	GSM734161	GSE29621	Affy U133plus2	Validation
1004	GSM734163	GSE29621	Affy U133plus2	Validation
1005	GSM734164	GSE29621	Affy U133plus2	Training
1006	GSM734168	GSE29621	Affy U133plus2	Training
1007	GSM734169	GSE29621	Affy U133plus2	Validation
1008	GSM734170	GSE29621	Affy U133plus2	Training
1009	GSM734172	GSE29621	Affy U133plus2	Validation
1010	GSM734114	GSE29621	Affy U133plus2	Training
1011	GSM734115	GSE29621	Affy U133plus2	Training
1012	GSM734121	GSE29621	Affy U133plus2	Training
1013	GSM734122	GSE29621	Affy U133plus2	Training
1014	GSM734125	GSE29621	Affy U133plus2	Training
1015	GSM734126	GSE29621	Affy U133plus2	Training
1016	GSM734127	GSE29621	Affy U133plus2	Training
1017	GSM734128	GSE29621	Affy U133plus2	Training
1018	GSM734133	GSE29621	Affy U133plus2	Validation
1019	GSM734138	GSE29621	Affy U133plus2	Training
1020	GSM734141	GSE29621	Affy U133plus2	Training
1021	GSM734143	GSE29621	Affy U133plus2	Training
1022	GSM734149	GSE29621	Affy U133plus2	Training
1023	GSM734151	GSE29621	Affy U133plus2	Validation
1024	GSM734152	GSE29621	Affy U133plus2	Training
1025	GSM734155	GSE29621	Affy U133plus2	Validation
1026	GSM734158	GSE29621	Affy U133plus2	Validation
1027	GSM734159	GSE29621	Affy U133plus2	Training
1028	GSM734160	GSE29621	Affy U133plus2	Training
1029	GSM734162	GSE29621	Affy U133plus2	Validation
1030	GSM734165	GSE29621	Affy U133plus2	Training
1031	GSM734166	GSE29621	Affy U133plus2	Training
1032	GSM734171	GSE29621	Affy U133plus2	Validation
1033	GSM734173	GSE29621	Affy U133plus2	Validation
1034	GSM734175	GSE29621	Affy U133plus2	Validation
1035	GSM712197	GSE24551	Affy Exon	Validation
1036	GSM712201	GSE24551	Affy Exon	Validation
1037	GSM712202	GSE24551	Affy Exon	Validation
1038	GSM712204	GSE24551	Affy Exon	Validation
1039	GSM712209	GSE24551	Affy Exon	Training
1040	GSM712210	GSE24551	Affy Exon	Training
1041	GSM712211	GSE24551	Affy Exon	Validation
1042	GSM712212	GSE24551	Affy Exon	Training
1043	GSM712213	GSE24551	Affy Exon	Training
1044	GSM712214	GSE24551	Affy Exon	Training
1045	GSM712215	GSE24551	Affy Exon	Training
1046	GSM712218	GSE24551	Affy Exon	Validation
1047	GSM712226	GSE24551	Affy Exon	Validation
1048	GSM712243	GSE24551	Affy Exon	Training
1049	GSM712248	GSE24551	Affy Exon	Training
1050	GSM712253	GSE24551	Affy Exon	Training
1051	GSM712255	GSE24551	Affy Exon	Training
1052	GSM712257	GSE24551	Affy Exon	Training
1053	GSM712259	GSE24551	Affy Exon	Training
1054	GSM712261	GSE24551	Affy Exon	Training
1055	GSM712264	GSE24551	Affy Exon	Validation
1056	GSM712265	GSE24551	Affy Exon	Training
1057	GSM712267	GSE24551	Affy Exon	Validation
1058	GSM712268	GSE24551	Affy Exon	Validation
1059	GSM712269	GSE24551	Affy Exon	Training
1060	GSM712270	GSE24551	Affy Exon	Validation
1061	GSM712272	GSE24551	Affy Exon	Training
1062	GSM712275	GSE24551	Affy Exon	Validation
1063	GSM712276	GSE24551	Affy Exon	Validation
1064	GSM712277	GSE24551	Affy Exon	Validation
1065	GSM712278	GSE24551	Affy Exon	Training
1066	GSM712279	GSE24551	Affy Exon	Training
1067	GSM712282	GSE24551	Affy Exon	Training
1068	GSM712285	GSE24551	Affy Exon	Training
1069	GSM712287	GSE24551	Affy Exon	Training
1070	GSM712289	GSE24551	Affy Exon	Validation
1071	GSM712293	GSE24551	Affy Exon	Training
1072	GSM712295	GSE24551	Affy Exon	Training
1073	GSM712298	GSE24551	Affy Exon	Validation
1074	GSM712579	GSE24551	Affy Exon	Validation
1075	GSM712580	GSE24551	Affy Exon	Training
1076	GSM712584	GSE24551	Affy Exon	Training
1077	GSM712587	GSE24551	Affy Exon	Training
1078	GSM712588	GSE24551	Affy Exon	Training
1079	GSM712589	GSE24551	Affy Exon	Validation
1080	GSM712590	GSE24551	Affy Exon	Training
1081	GSM712593	GSE24551	Affy Exon	Validation
1082	GSM712601	GSE24551	Affy Exon	Validation
1083	GSM712602	GSE24551	Affy Exon	Training
1084	GSM712606	GSE24551	Affy Exon	Validation
1085	GSM712608	GSE24551	Affy Exon	Validation
1086	GSM712609	GSE24551	Affy Exon	Validation
1087	GSM712611	GSE24551	Affy Exon	Validation
1088	GSM712612	GSE24551	Affy Exon	Validation
1089	GSM712614	GSE24551	Affy Exon	Training
1090	GSM712615	GSE24551	Affy Exon	Training
1091	GSM712616	GSE24551	Affy Exon	Training
1092	GSM712618	GSE24551	Affy Exon	Validation
1093	GSM712619	GSE24551	Affy Exon	Training
1094	GSM712620	GSE24551	Affy Exon	Training
1095	GSM712623	GSE24551	Affy Exon	Training
1096	GSM712625	GSE24551	Affy Exon	Validation
1097	GSM712626	GSE24551	Affy Exon	Training
1098	GSM712627	GSE24551	Affy Exon	Validation
1099	GSM712629	GSE24551	Affy Exon	Training
1100	GSM712631	GSE24551	Affy Exon	Training
1101	GSM712635	GSE24551	Affy Exon	Validation
1102	GSM712636	GSE24551	Affy Exon	Validation
1103	GSM712637	GSE24551	Affy Exon	Validation
1104	GSM712640	GSE24551	Affy Exon	Validation
1105	GSM712641	GSE24551	Affy Exon	Validation
1106	GSM712644	GSE24551	Affy Exon	Training
1107	GSM712646	GSE24551	Affy Exon	Training
1108	GSM712198	GSE24551	Affy Exon	Validation
1109	GSM712199	GSE24551	Affy Exon	Training
1110	GSM712200	GSE24551	Affy Exon	Training
1111	GSM712203	GSE24551	Affy Exon	Training
1112	GSM712205	GSE24551	Affy Exon	Validation
1113	GSM712207	GSE24551	Affy Exon	Validation
1114	GSM712208	GSE24551	Affy Exon	Validation
1115	GSM712216	GSE24551	Affy Exon	Validation
1116	GSM712221	GSE24551	Affy Exon	Training
1117	GSM712224	GSE24551	Affy Exon	Training
1118	GSM712228	GSE24551	Affy Exon	Training
1119	GSM712231	GSE24551	Affy Exon	Training
1120	GSM712237	GSE24551	Affy Exon	Training
1121	GSM712241	GSE24551	Affy Exon	Training
1122	GSM712251	GSE24551	Affy Exon	Training
1123	GSM712258	GSE24551	Affy Exon	Validation
1124	GSM712260	GSE24551	Affy Exon	Validation
1125	GSM712262	GSE24551	Affy Exon	Training
1126	GSM712263	GSE24551	Affy Exon	Validation
1127	GSM712273	GSE24551	Affy Exon	Validation
1128	GSM712280	GSE24551	Affy Exon	Validation
1129	GSM712281	GSE24551	Affy Exon	Validation
1130	GSM712283	GSE24551	Affy Exon	Validation
1131	GSM712284	GSE24551	Affy Exon	Validation
1132	GSM712286	GSE24551	Affy Exon	Training
1133	GSM712288	GSE24551	Affy Exon	Training
1134	GSM712290	GSE24551	Affy Exon	Training
1135	GSM712291	GSE24551	Affy Exon	Validation
1136	GSM712292	GSE24551	Affy Exon	Validation
1137	GSM712294	GSE24551	Affy Exon	Validation
1138	GSM712296	GSE24551	Affy Exon	Training
1139	GSM712297	GSE24551	Affy Exon	Validation
1140	GSM712299	GSE24551	Affy Exon	Validation
1141	GSM712575	GSE24551	Affy Exon	Validation
1142	GSM712576	GSE24551	Affy Exon	Training
1143	GSM712577	GSE24551	Affy Exon	Training
1144	GSM712578	GSE24551	Affy Exon	Training
1145	GSM712581	GSE24551	Affy Exon	Validation
1146	GSM712582	GSE24551	Affy Exon	Training
1147	GSM712583	GSE24551	Affy Exon	Training
1148	GSM712585	GSE24551	Affy Exon	Training
1149	GSM712586	GSE24551	Affy Exon	Validation
1150	GSM712591	GSE24551	Affy Exon	Training
1151	GSM712592	GSE24551	Affy Exon	Training
1152	GSM712594	GSE24551	Affy Exon	Validation
1153	GSM712596	GSE24551	Affy Exon	Validation
1154	GSM712597	GSE24551	Affy Exon	Validation
1155	GSM712598	GSE24551	Affy Exon	Validation
1156	GSM712600	GSE24551	Affy Exon	Training
1157	GSM712603	GSE24551	Affy Exon	Training
1158	GSM712605	GSE24551	Affy Exon	Validation
1159	GSM712607	GSE24551	Affy Exon	Validation
1160	GSM712610	GSE24551	Affy Exon	Training
1161	GSM712613	GSE24551	Affy Exon	Validation
1162	GSM712617	GSE24551	Affy Exon	Training
1163	GSM712621	GSE24551	Affy Exon	Validation
1164	GSM712622	GSE24551	Affy Exon	Validation
1165	GSM712624	GSE24551	Affy Exon	Validation
1166	GSM712628	GSE24551	Affy Exon	Training
1167	GSM712632	GSE24551	Affy Exon	Validation
1168	GSM712633	GSE24551	Affy Exon	Training
1169	GSM712634	GSE24551	Affy Exon	Training
1170	GSM712638	GSE24551	Affy Exon	Training
1171	GSM712642	GSE24551	Affy Exon	Training
1172	GSM712643	GSE24551	Affy Exon	Validation
1173	GSM712645	GSE24551	Affy Exon	Training
1174	GSM712647	GSE24551	Affy Exon	Training
1175	GSM712649	GSE24551	Affy Exon	Training
1176	GSM437270	GSE17537	Affy U133plus2	Training
1177	GSM437271	GSE17537	Affy U133plus2	Validation
1178	GSM437272	GSE17537	Affy U133plus2	Validation
1179	GSM437273	GSE17537	Affy U133plus2	Training
1180	GSM437275	GSE17537	Affy U133plus2	Training
1181	GSM437276	GSE17537	Affy U133plus2	Validation
1182	GSM437279	GSE17537	Affy U133plus2	Validation
1183	GSM437280	GSE17537	Affy U133plus2	Training
1184	GSM437282	GSE17537	Affy U133plus2	Training
1185	GSM437285	GSE17537	Affy U133plus2	Training
1186	GSM437287	GSE17537	Affy U133plus2	Training
1187	GSM437290	GSE17537	Affy U133plus2	Validation
1188	GSM437292	GSE17537	Affy U133plus2	Training
1189	GSM437293	GSE17537	Affy U133plus2	Training
1190	GSM437296	GSE17537	Affy U133plus2	Training
1191	GSM437297	GSE17537	Affy U133plus2	Training
1192	GSM437298	GSE17537	Affy U133plus2	Training
1193	GSM437299	GSE17537	Affy U133plus2	Training
1194	GSM437304	GSE17537	Affy U133plus2	Training
1195	GSM437307	GSE17537	Affy U133plus2	Validation
1196	GSM437309	GSE17537	Affy U133plus2	Validation
1197	GSM437315	GSE17537	Affy U133plus2	Validation
1198	GSM437317	GSE17537	Affy U133plus2	Training
1199	GSM437319	GSE17537	Affy U133plus2	Training
1200	GSM437320	GSE17537	Affy U133plus2	Training
1201	GSM437322	GSE17537	Affy U133plus2	Training
1202	GSM437274	GSE17537	Affy U133plus2	Training
1203	GSM437277	GSE17537	Affy U133plus2	Training
1204	GSM437278	GSE17537	Affy U133plus2	Validation
1205	GSM437281	GSE17537	Affy U133plus2	Training
1206	GSM437283	GSE17537	Affy U133plus2	Training
1207	GSM437284	GSE17537	Affy U133plus2	Training
1208	GSM437286	GSE17537	Affy U133plus2	Validation
1209	GSM437288	GSE17537	Affy U133plus2	Validation
1210	GSM437291	GSE17537	Affy U133plus2	Validation
1211	GSM437294	GSE17537	Affy U133plus2	Training
1212	GSM437295	GSE17537	Affy U133plus2	Training
1213	GSM437300	GSE17537	Affy U133plus2	Validation
1214	GSM437301	GSE17537	Affy U133plus2	Validation
1215	GSM437302	GSE17537	Affy U133plus2	Training
1216	GSM437303	GSE17537	Affy U133plus2	Training
1217	GSM437306	GSE17537	Affy U133plus2	Validation
1218	GSM437308	GSE17537	Affy U133plus2	Validation
1219	GSM437310	GSE17537	Affy U133plus2	Training
1220	GSM437311	GSE17537	Affy U133plus2	Training
1221	GSM437312	GSE17537	Affy U133plus2	Training
1222	GSM437313	GSE17537	Affy U133plus2	Validation
1223	GSM437314	GSE17537	Affy U133plus2	Validation
1224	GSM437316	GSE17537	Affy U133plus2	Training
1225	GSM437318	GSE17537	Affy U133plus2	Training
1226	GSM437321	GSE17537	Affy U133plus2	Training
1227	GSM437323	GSE17537	Affy U133plus2	Validation
1228	GSM437324	GSE17537	Affy U133plus2	Validation
1229	GSM437093	GSE17536	Affy U133plus2	Validation
1230	GSM437097	GSE17536	Affy U133plus2	Training
1231	GSM437102	GSE17536	Affy U133plus2	Training
1232	GSM437103	GSE17536	Affy U133plus2	Validation
1233	GSM437109	GSE17536	Affy U133plus2	Training
1234	GSM437110	GSE17536	Affy U133plus2	Validation
1235	GSM437111	GSE17536	Affy U133plus2	Validation
1236	GSM437116	GSE17536	Affy U133plus2	Validation
1237	GSM437118	GSE17536	Affy U133plus2	Validation
1238	GSM437120	GSE17536	Affy U133plus2	Validation
1239	GSM437121	GSE17536	Affy U133plus2	Validation
1240	GSM437124	GSE17536	Affy U133plus2	Training
1241	GSM437131	GSE17536	Affy U133plus2	Training
1242	GSM437132	GSE17536	Affy U133plus2	Validation
1243	GSM437134	GSE17536	Affy U133plus2	Validation
1244	GSM437138	GSE17536	Affy U133plus2	Training
1245	GSM437140	GSE17536	Affy U133plus2	Validation
1246	GSM437147	GSE17536	Affy U133plus2	Validation
1247	GSM437148	GSE17536	Affy U133plus2	Validation
1248	GSM437149	GSE17536	Affy U133plus2	Training
1249	GSM437151	GSE17536	Affy U133plus2	Validation
1250	GSM437153	GSE17536	Affy U133plus2	Validation
1251	GSM437159	GSE17536	Affy U133plus2	Training
1252	GSM437160	GSE17536	Affy U133plus2	Validation
1253	GSM437161	GSE17536	Affy U133plus2	Training
1254	GSM437164	GSE17536	Affy U133plus2	Training
1255	GSM437165	GSE17536	Affy U133plus2	Training
1256	GSM437168	GSE17536	Affy U133plus2	Validation
1257	GSM437169	GSE17536	Affy U133plus2	Validation
1258	GSM437170	GSE17536	Affy U133plus2	Validation
1259	GSM437171	GSE17536	Affy U133plus2	Validation
1260	GSM437173	GSE17536	Affy U133plus2	Validation
1261	GSM437179	GSE17536	Affy U133plus2	Training
1262	GSM437185	GSE17536	Affy U133plus2	Training
1263	GSM437186	GSE17536	Affy U133plus2	Validation
1264	GSM437187	GSE17536	Affy U133plus2	Training
1265	GSM437188	GSE17536	Affy U133plus2	Validation
1266	GSM437189	GSE17536	Affy U133plus2	Training
1267	GSM437192	GSE17536	Affy U133plus2	Training
1268	GSM437194	GSE17536	Affy U133plus2	Training
1269	GSM437197	GSE17536	Affy U133plus2	Training
1270	GSM437198	GSE17536	Affy U133plus2	Validation
1271	GSM437200	GSE17536	Affy U133plus2	Training
1272	GSM437202	GSE17536	Affy U133plus2	Training
1273	GSM437203	GSE17536	Affy U133plus2	Validation
1274	GSM437204	GSE17536	Affy U133plus2	Training
1275	GSM437205	GSE17536	Affy U133plus2	Validation
1276	GSM437207	GSE17536	Affy U133plus2	Validation
1277	GSM437209	GSE17536	Affy U133plus2	Validation
1278	GSM437211	GSE17536	Affy U133plus2	Validation
1279	GSM437212	GSE17536	Affy U133plus2	Training
1280	GSM437215	GSE17536	Affy U133plus2	Validation
1281	GSM437216	GSE17536	Affy U133plus2	Training
1282	GSM437219	GSE17536	Affy U133plus2	Validation
1283	GSM437220	GSE17536	Affy U133plus2	Validation
1284	GSM437222	GSE17536	Affy U133plus2	Validation
1285	GSM437223	GSE17536	Affy U133plus2	Validation
1286	GSM437225	GSE17536	Affy U133plus2	Validation
1287	GSM437227	GSE17536	Affy U133plus2	Validation
1288	GSM437228	GSE17536	Affy U133plus2	Validation
1289	GSM437231	GSE17536	Affy U133plus2	Training
1290	GSM437236	GSE17536	Affy U133plus2	Training
1291	GSM437238	GSE17536	Affy U133plus2	Training
1292	GSM437240	GSE17536	Affy U133plus2	Validation
1293	GSM437241	GSE17536	Affy U133plus2	Validation
1294	GSM437242	GSE17536	Affy U133plus2	Training
1295	GSM437243	GSE17536	Affy U133plus2	Validation
1296	GSM437245	GSE17536	Affy U133plus2	Validation
1297	GSM437246	GSE17536	Affy U133plus2	Training
1298	GSM437250	GSE17536	Affy U133plus2	Training
1299	GSM437253	GSE17536	Affy U133plus2	Training
1300	GSM437254	GSE17536	Affy U133plus2	Validation
1301	GSM437255	GSE17536	Affy U133plus2	Validation
1302	GSM437257	GSE17536	Affy U133plus2	Training
1303	GSM437260	GSE17536	Affy U133plus2	Training
1304	GSM437261	GSE17536	Affy U133plus2	Validation
1305	GSM437264	GSE17536	Affy U133plus2	Validation
1306	GSM437265	GSE17536	Affy U133plus2	Validation
1307	GSM437267	GSE17536	Affy U133plus2	Validation
1308	GSM437268	GSE17536	Affy U133plus2	Training
1309	GSM437094	GSE17536	Affy U133plus2	Training
1310	GSM437095	GSE17536	Affy U133plus2	Training
1311	GSM437096	GSE17536	Affy U133plus2	Validation
1312	GSM437098	GSE17536	Affy U133plus2	Validation
1313	GSM437099	GSE17536	Affy U133plus2	Validation
1314	GSM437101	GSE17536	Affy U133plus2	Validation
1315	GSM437104	GSE17536	Affy U133plus2	Validation
1316	GSM437105	GSE17536	Affy U133plus2	Validation
1317	GSM437107	GSE17536	Affy U133plus2	Training
1318	GSM437108	GSE17536	Affy U133plus2	Validation
1319	GSM437112	GSE17536	Affy U133plus2	Training
1320	GSM437113	GSE17536	Affy U133plus2	Training
1321	GSM437114	GSE17536	Affy U133plus2	Training
1322	GSM437115	GSE17536	Affy U133plus2	Training
1323	GSM437117	GSE17536	Affy U133plus2	Training
1324	GSM437119	GSE17536	Affy U133plus2	Validation
1325	GSM437122	GSE17536	Affy U133plus2	Training
1326	GSM437125	GSE17536	Affy U133plus2	Training
1327	GSM437126	GSE17536	Affy U133plus2	Training
1328	GSM437128	GSE17536	Affy U133plus2	Validation
1329	GSM437129	GSE17536	Affy U133plus2	Training
1330	GSM437130	GSE17536	Affy U133plus2	Validation
1331	GSM437133	GSE17536	Affy U133plus2	Validation
1332	GSM437135	GSE17536	Affy U133plus2	Training
1333	GSM437136	GSE17536	Affy U133plus2	Validation
1334	GSM437137	GSE17536	Affy U133plus2	Validation
1335	GSM437139	GSE17536	Affy U133plus2	Validation
1336	GSM437141	GSE17536	Affy U133plus2	Validation
1337	GSM437142	GSE17536	Affy U133plus2	Validation
1338	GSM437144	GSE17536	Affy U133plus2	Training
1339	GSM437145	GSE17536	Affy U133plus2	Validation
1340	GSM437146	GSE17536	Affy U133plus2	Training
1341	GSM437152	GSE17536	Affy U133plus2	Validation
1342	GSM437154	GSE17536	Affy U133plus2	Validation
1343	GSM437155	GSE17536	Affy U133plus2	Validation
1344	GSM437157	GSE17536	Affy U133plus2	Training
1345	GSM437158	GSE17536	Affy U133plus2	Training
1346	GSM437162	GSE17536	Affy U133plus2	Training
1347	GSM437163	GSE17536	Affy U133plus2	Training
1348	GSM437166	GSE17536	Affy U133plus2	Validation
1349	GSM437167	GSE17536	Affy U133plus2	Validation
1350	GSM437175	GSE17536	Affy U133plus2	Validation
1351	GSM437176	GSE17536	Affy U133plus2	Validation
1352	GSM437177	GSE17536	Affy U133plus2	Validation
1353	GSM437181	GSE17536	Affy U133plus2	Validation
1354	GSM437182	GSE17536	Affy U133plus2	Validation
1355	GSM437183	GSE17536	Affy U133plus2	Validation
1356	GSM437190	GSE17536	Affy U133plus2	Validation
1357	GSM437191	GSE17536	Affy U133plus2	Training
1358	GSM437193	GSE17536	Affy U133plus2	Training
1359	GSM437195	GSE17536	Affy U133plus2	Validation
1360	GSM437199	GSE17536	Affy U133plus2	Validation
1361	GSM437201	GSE17536	Affy U133plus2	Training
1362	GSM437206	GSE17536	Affy U133plus2	Training
1363	GSM437208	GSE17536	Affy U133plus2	Validation
1364	GSM437210	GSE17536	Affy U133plus2	Validation
1365	GSM437213	GSE17536	Affy U133plus2	Validation
1366	GSM437214	GSE17536	Affy U133plus2	Training
1367	GSM437218	GSE17536	Affy U133plus2	Validation
1368	GSM437221	GSE17536	Affy U133plus2	Training
1369	GSM437226	GSE17536	Affy U133plus2	Training
1370	GSM437229	GSE17536	Affy U133plus2	Validation
1371	GSM437230	GSE17536	Affy U133plus2	Validation
1372	GSM437232	GSE17536	Affy U133plus2	Validation
1373	GSM437233	GSE17536	Affy U133plus2	Validation
1374	GSM437234	GSE17536	Affy U133plus2	Training
1375	GSM437235	GSE17536	Affy U133plus2	Validation
1376	GSM437237	GSE17536	Affy U133plus2	Training
1377	GSM437239	GSE17536	Affy U133plus2	Validation
1378	GSM437244	GSE17536	Affy U133plus2	Training
1379	GSM437248	GSE17536	Affy U133plus2	Training
1380	GSM437251	GSE17536	Affy U133plus2	Training
1381	GSM437252	GSE17536	Affy U133plus2	Training
1382	GSM437256	GSE17536	Affy U133plus2	Validation
1383	GSM437258	GSE17536	Affy U133plus2	Validation
1384	GSM437259	GSE17536	Affy U133plus2	Validation
1385	GSM437262	GSE17536	Affy U133plus2	Training
1386	GSM437263	GSE17536	Affy U133plus2	Validation
1387	GSM437266	GSE17536	Affy U133plus2	Training
1388	GSM437269	GSE17536	Affy U133plus2	Training
1389	GSM358342	GSE14333	Affy U133A	Validation
1390	GSM358346	GSE14333	Affy U133A	Validation
1391	GSM358348	GSE14333	Affy U133A	Training
1392	GSM358351	GSE14333	Affy U133A	Training
1393	GSM358354	GSE14333	Affy U133A	Training
1394	GSM358355	GSE14333	Affy U133A	Training
1395	GSM358356	GSE14333	Affy U133A	Validation
1396	GSM358357	GSE14333	Affy U133A	Training
1397	GSM358358	GSE14333	Affy U133A	Training
1398	GSM358360	GSE14333	Affy U133A	Validation
1399	GSM358366	GSE14333	Affy U133A	Training
1400	GSM358367	GSE14333	Affy U133A	Validation
1401	GSM358368	GSE14333	Affy U133A	Training
1402	GSM358369	GSE14333	Affy U133A	Validation
1403	GSM358371	GSE14333	Affy U133A	Training
1404	GSM358372	GSE14333	Affy U133A	Training
1405	GSM358375	GSE14333	Affy U133A	Training
1406	GSM358376	GSE14333	Affy U133A	Training
1407	GSM358377	GSE14333	Affy U133A	Training
1408	GSM358378	GSE14333	Affy U133A	Training
1409	GSM358383	GSE14333	Affy U133A	Training
1410	GSM358385	GSE14333	Affy U133A	Training
1411	GSM358386	GSE14333	Affy U133A	Training
1412	GSM358387	GSE14333	Affy U133A	Validation
1413	GSM358388	GSE14333	Affy U133A	Training
1414	GSM358394	GSE14333	Affy U133A	Validation
1415	GSM358395	GSE14333	Affy U133A	Training
1416	GSM358396	GSE14333	Affy U133A	Training
1417	GSM358397	GSE14333	Affy U133A	Training
1418	GSM358399	GSE14333	Affy U133A	Validation
1419	GSM358400	GSE14333	Affy U133A	Training
1420	GSM358401	GSE14333	Affy U133A	Validation
1421	GSM358402	GSE14333	Affy U133A	Validation
1422	GSM358405	GSE14333	Affy U133A	Training
1423	GSM358409	GSE14333	Affy U133A	Validation
1424	GSM358411	GSE14333	Affy U133A	Validation
1425	GSM358413	GSE14333	Affy U133A	Validation
1426	GSM358414	GSE14333	Affy U133A	Validation
1427	GSM358420	GSE14333	Affy U133A	Training
1428	GSM358426	GSE14333	Affy U133A	Training
1429	GSM358427	GSE14333	Affy U133A	Validation
1430	GSM358430	GSE14333	Affy U133A	Validation
1431	GSM358432	GSE14333	Affy U133A	Training
1432	GSM358434	GSE14333	Affy U133A	Validation
1433	GSM358436	GSE14333	Affy U133A	Validation
1434	GSM358437	GSE14333	Affy U133A	Training
1435	GSM358438	GSE14333	Affy U133A	Validation
1436	GSM358439	GSE14333	Affy U133A	Training
1437	GSM358440	GSE14333	Affy U133A	Training
1438	GSM358443	GSE14333	Affy U133A	Validation
1439	GSM358445	GSE14333	Affy U133A	Training
1440	GSM358448	GSE14333	Affy U133A	Validation
1441	GSM358456	GSE14333	Affy U133A	Training
1442	GSM358457	GSE14333	Affy U133A	Training
1443	GSM358459	GSE14333	Affy U133A	Validation
1444	GSM358461	GSE14333	Affy U133A	Training
1445	GSM358462	GSE14333	Affy U133A	Training
1446	GSM358463	GSE14333	Affy U133A	Training
1447	GSM358466	GSE14333	Affy U133A	Validation
1448	GSM358467	GSE14333	Affy U133A	Validation
1449	GSM358468	GSE14333	Affy U133A	Training
1450	GSM358469	GSE14333	Affy U133A	Training
1451	GSM358472	GSE14333	Affy U133A	Validation
1452	GSM358474	GSE14333	Affy U133A	Validation
1453	GSM358477	GSE14333	Affy U133A	Validation
1454	GSM358479	GSE14333	Affy U133A	Training
1455	GSM358480	GSE14333	Affy U133A	Training
1456	GSM358481	GSE14333	Affy U133A	Training
1457	GSM358483	GSE14333	Affy U133A	Validation
1458	GSM358485	GSE14333	Affy U133A	Validation
1459	GSM358487	GSE14333	Affy U133A	Training
1460	GSM358488	GSE14333	Affy U133A	Training
1461	GSM358489	GSE14333	Affy U133A	Validation
1462	GSM358498	GSE14333	Affy U133A	Validation
1463	GSM358499	GSE14333	Affy U133A	Training
1464	GSM358501	GSE14333	Affy U133A	Training
1465	GSM358503	GSE14333	Affy U133A	Training
1466	GSM358504	GSE14333	Affy U133A	Validation
1467	GSM358506	GSE14333	Affy U133A	Validation
1468	GSM358511	GSE14333	Affy U133A	Validation
1469	GSM358512	GSE14333	Affy U133A	Training
1470	GSM358514	GSE14333	Affy U133A	Validation
1471	GSM358516	GSE14333	Affy U133A	Validation
1472	GSM358522	GSE14333	Affy U133A	Validation
1473	GSM358525	GSE14333	Affy U133A	Training
1474	GSM358526	GSE14333	Affy U133A	Validation
1475	GSM358527	GSE14333	Affy U133A	Validation
1476	GSM358530	GSE14333	Affy U133A	Training
1477	GSM358534	GSE14333	Affy U133A	Training
1478	GSM358535	GSE14333	Affy U133A	Validation
1479	GSM358536	GSE14333	Affy U133A	Validation
1480	GSM358538	GSE14333	Affy U133A	Validation
1481	GSM358545	GSE14333	Affy U133A	Training
1482	GSM358546	GSE14333	Affy U133A	Validation
1483	GSM358547	GSE14333	Affy U133A	Training
1484	GSM358550	GSE14333	Affy U133A	Training
1485	GSM358551	GSE14333	Affy U133A	Training
1486	GSM358553	GSE14333	Affy U133A	Validation
1487	GSM358555	GSE14333	Affy U133A	Training
1488	GSM358556	GSE14333	Affy U133A	Training
1489	GSM358557	GSE14333	Affy U133A	Validation
1490	GSM358558	GSE14333	Affy U133A	Validation
1491	GSM358559	GSE14333	Affy U133A	Validation
1492	GSM358560	GSE14333	Affy U133A	Validation
1493	GSM358563	GSE14333	Affy U133A	Validation
1494	GSM358566	GSE14333	Affy U133A	Validation
1495	GSM358570	GSE14333	Affy U133A	Training
1496	GSM358572	GSE14333	Affy U133A	Training
1497	GSM358577	GSE14333	Affy U133A	Validation
1498	GSM358580	GSE14333	Affy U133A	Validation
1499	GSM358581	GSE14333	Affy U133A	Training
1500	GSM358582	GSE14333	Affy U133A	Training
1501	GSM358584	GSE14333	Affy U133A	Validation
1502	GSM358586	GSE14333	Affy U133A	Training
1503	GSM358587	GSE14333	Affy U133A	Validation
1504	GSM358592	GSE14333	Affy U133A	Training
1505	GSM358593	GSE14333	Affy U133A	Training
1506	GSM358598	GSE14333	Affy U133A	Training
1507	GSM358599	GSE14333	Affy U133A	Training
1508	GSM358604	GSE14333	Affy U133A	Validation
1509	GSM358605	GSE14333	Affy U133A	Training
1510	GSM358606	GSE14333	Affy U133A	Training
1511	GSM358607	GSE14333	Affy U133A	Validation
1512	GSM358614	GSE14333	Affy U133A	Training
1513	GSM358615	GSE14333	Affy U133A	Training
1514	GSM358619	GSE14333	Affy U133A	Validation
1515	GSM358620	GSE14333	Affy U133A	Training
1516	GSM358623	GSE14333	Affy U133A	Validation
1517	GSM358625	GSE14333	Affy U133A	Training
1518	GSM358630	GSE14333	Affy U133A	Training
1519	GSM358341	GSE14333	Affy U133A	Validation
1520	GSM358343	GSE14333	Affy U133A	Training
1521	GSM358344	GSE14333	Affy U133A	Validation
1522	GSM358347	GSE14333	Affy U133A	Training
1523	GSM358349	GSE14333	Affy U133A	Training
1524	GSM358350	GSE14333	Affy U133A	Training
1525	GSM358352	GSE14333	Affy U133A	Training
1526	GSM358353	GSE14333	Affy U133A	Training
1527	GSM358359	GSE14333	Affy U133A	Training
1528	GSM358361	GSE14333	Affy U133A	Validation
1529	GSM358362	GSE14333	Affy U133A	Validation
1530	GSM358363	GSE14333	Affy U133A	Training
1531	GSM358364	GSE14333	Affy U133A	Training
1532	GSM358370	GSE14333	Affy U133A	Training
1533	GSM358373	GSE14333	Affy U133A	Training
1534	GSM358374	GSE14333	Affy U133A	Training
1535	GSM358379	GSE14333	Affy U133A	Validation
1536	GSM358380	GSE14333	Affy U133A	Training
1537	GSM358381	GSE14333	Affy U133A	Validation
1538	GSM358382	GSE14333	Affy U133A	Validation
1539	GSM358384	GSE14333	Affy U133A	Validation
1540	GSM358389	GSE14333	Affy U133A	Training
1541	GSM358390	GSE14333	Affy U133A	Validation
1542	GSM358392	GSE14333	Affy U133A	Training
1543	GSM358398	GSE14333	Affy U133A	Validation
1544	GSM358403	GSE14333	Affy U133A	Validation
1545	GSM358404	GSE14333	Affy U133A	Validation
1546	GSM358406	GSE14333	Affy U133A	Validation
1547	GSM358408	GSE14333	Affy U133A	Validation
1548	GSM358410	GSE14333	Affy U133A	Training
1549	GSM358412	GSE14333	Affy U133A	Training
1550	GSM358416	GSE14333	Affy U133A	Training
1551	GSM358417	GSE14333	Affy U133A	Training
1552	GSM358418	GSE14333	Affy U133A	Validation
1553	GSM358421	GSE14333	Affy U133A	Validation
1554	GSM358422	GSE14333	Affy U133A	Training
1555	GSM358423	GSE14333	Affy U133A	Training
1556	GSM358424	GSE14333	Affy U133A	Validation
1557	GSM358428	GSE14333	Affy U133A	Training
1558	GSM358431	GSE14333	Affy U133A	Training
1559	GSM358435	GSE14333	Affy U133A	Training
1560	GSM358441	GSE14333	Affy U133A	Training
1561	GSM358442	GSE14333	Affy U133A	Validation
1562	GSM358444	GSE14333	Affy U133A	Validation
1563	GSM358446	GSE14333	Affy U133A	Training
1564	GSM358447	GSE14333	Affy U133A	Training
1565	GSM358449	GSE14333	Affy U133A	Training
1566	GSM358450	GSE14333	Affy U133A	Validation
1567	GSM358451	GSE14333	Affy U133A	Validation
1568	GSM358453	GSE14333	Affy U133A	Validation
1569	GSM358454	GSE14333	Affy U133A	Validation
1570	GSM358455	GSE14333	Affy U133A	Training
1571	GSM358458	GSE14333	Affy U133A	Validation
1572	GSM358460	GSE14333	Affy U133A	Training
1573	GSM358464	GSE14333	Affy U133A	Validation
1574	GSM358465	GSE14333	Affy U133A	Training
1575	GSM358470	GSE14333	Affy U133A	Validation
1576	GSM358471	GSE14333	Affy U133A	Training
1577	GSM358475	GSE14333	Affy U133A	Training
1578	GSM358476	GSE14333	Affy U133A	Training
1579	GSM358482	GSE14333	Affy U133A	Validation
1580	GSM358484	GSE14333	Affy U133A	Validation
1581	GSM358486	GSE14333	Affy U133A	Training
1582	GSM358490	GSE14333	Affy U133A	Training
1583	GSM358491	GSE14333	Affy U133A	Training
1584	GSM358492	GSE14333	Affy U133A	Validation
1585	GSM358493	GSE14333	Affy U133A	Validation
1586	GSM358494	GSE14333	Affy U133A	Validation
1587	GSM358495	GSE14333	Affy U133A	Validation
1588	GSM358496	GSE14333	Affy U133A	Training
1589	GSM358497	GSE14333	Affy U133A	Validation
1590	GSM358502	GSE14333	Affy U133A	Training
1591	GSM358508	GSE14333	Affy U133A	Validation
1592	GSM358510	GSE14333	Affy U133A	Validation
1593	GSM358513	GSE14333	Affy U133A	Training
1594	GSM358515	GSE14333	Affy U133A	Validation
1595	GSM358517	GSE14333	Affy U133A	Validation
1596	GSM358518	GSE14333	Affy U133A	Validation
1597	GSM358519	GSE14333	Affy U133A	Validation
1598	GSM358521	GSE14333	Affy U133A	Training
1599	GSM358523	GSE14333	Affy U133A	Validation
1600	GSM358524	GSE14333	Affy U133A	Validation
1601	GSM358531	GSE14333	Affy U133A	Training
1602	GSM358532	GSE14333	Affy U133A	Validation
1603	GSM358533	GSE14333	Affy U133A	Validation
1604	GSM358537	GSE14333	Affy U133A	Training
1605	GSM358539	GSE14333	Affy U133A	Training
1606	GSM358540	GSE14333	Affy U133A	Validation
1607	GSM358541	GSE14333	Affy U133A	Validation
1608	GSM358542	GSE14333	Affy U133A	Training
1609	GSM358543	GSE14333	Affy U133A	Validation
1610	GSM358544	GSE14333	Affy U133A	Validation
1611	GSM358548	GSE14333	Affy U133A	Training
1612	GSM358549	GSE14333	Affy U133A	Training
1613	GSM358552	GSE14333	Affy U133A	Validation
1614	GSM358554	GSE14333	Affy U133A	Training
1615	GSM358562	GSE14333	Affy U133A	Validation
1616	GSM358564	GSE14333	Affy U133A	Training
1617	GSM358567	GSE14333	Affy U133A	Training
1618	GSM358568	GSE14333	Affy U133A	Training
1619	GSM358569	GSE14333	Affy U133A	Validation
1620	GSM358571	GSE14333	Affy U133A	Training
1621	GSM358573	GSE14333	Affy U133A	Validation
1622	GSM358574	GSE14333	Affy U133A	Validation
1623	GSM358576	GSE14333	Affy U133A	Validation
1624	GSM358578	GSE14333	Affy U133A	Training
1625	GSM358579	GSE14333	Affy U133A	Training
1626	GSM358583	GSE14333	Affy U133A	Training
1627	GSM358585	GSE14333	Affy U133A	Validation
1628	GSM358588	GSE14333	Affy U133A	Validation
1629	GSM358589	GSE14333	Affy U133A	Training
1630	GSM358590	GSE14333	Affy U133A	Validation
1631	GSM358591	GSE14333	Affy U133A	Training
1632	GSM358594	GSE14333	Affy U133A	Validation
1633	GSM358595	GSE14333	Affy U133A	Validation
1634	GSM358596	GSE14333	Affy U133A	Validation
1635	GSM358597	GSE14333	Affy U133A	Validation
1636	GSM358600	GSE14333	Affy U133A	Training
1637	GSM358601	GSE14333	Affy U133A	Training
1638	GSM358602	GSE14333	Affy U133A	Training
1639	GSM358603	GSE14333	Affy U133A	Validation
1640	GSM358608	GSE14333	Affy U133A	Validation
1641	GSM358609	GSE14333	Affy U133A	Training
1642	GSM358610	GSE14333	Affy U133A	Validation
1643	GSM358612	GSE14333	Affy U133A	Training
1644	GSM358613	GSE14333	Affy U133A	Training
1645	GSM358617	GSE14333	Affy U133A	Validation
1646	GSM358618	GSE14333	Affy U133A	Training
1647	GSM358621	GSE14333	Affy U133A	Training
1648	GSM358622	GSE14333	Affy U133A	Training
1649	GSM358624	GSE14333	Affy U133A	Training
1650	GSM358626	GSE14333	Affy U133A	Training
1651	GSM358627	GSE14333	Affy U133A	Training
1652	GSM358628	GSE14333	Affy U133A	Validation
1653	GSM324716	GSE12945	Affy U133A	Training
1654	GSM324718	GSE12945	Affy U133A	Validation
1655	GSM324719	GSE12945	Affy U133A	Training
1656	GSM324721	GSE12945	Affy U133A	Validation
1657	GSM324724	GSE12945	Affy U133A	Validation
1658	GSM324725	GSE12945	Affy U133A	Validation
1659	GSM324730	GSE12945	Affy U133A	Validation
1660	GSM324731	GSE12945	Affy U133A	Training
1661	GSM324732	GSE12945	Affy U133A	Validation
1662	GSM324733	GSE12945	Affy U133A	Validation
1663	GSM324736	GSE12945	Affy U133A	Training
1664	GSM324737	GSE12945	Affy U133A	Training
1665	GSM324738	GSE12945	Affy U133A	Validation
1666	GSM324739	GSE12945	Affy U133A	Training
1667	GSM324740	GSE12945	Affy U133A	Training
1668	GSM324741	GSE12945	Affy U133A	Validation
1669	GSM324745	GSE12945	Affy U133A	Validation
1670	GSM324750	GSE12945	Affy U133A	Validation
1671	GSM324752	GSE12945	Affy U133A	Validation
1672	GSM324754	GSE12945	Affy U133A	Training
1673	GSM324756	GSE12945	Affy U133A	Training
1674	GSM324758	GSE12945	Affy U133A	Training
1675	GSM324760	GSE12945	Affy U133A	Training
1676	GSM324762	GSE12945	Affy U133A	Training
1677	GSM324763	GSE12945	Affy U133A	Validation
1678	GSM324767	GSE12945	Affy U133A	Validation
1679	GSM324768	GSE12945	Affy U133A	Validation
1680	GSM324770	GSE12945	Affy U133A	Training
1681	GSM324771	GSE12945	Affy U133A	Training
1682	GSM324775	GSE12945	Affy U133A	Validation
1683	GSM324715	GSE12945	Affy U133A	Validation
1684	GSM324717	GSE12945	Affy U133A	Training
1685	GSM324720	GSE12945	Affy U133A	Validation
1686	GSM324723	GSE12945	Affy U133A	Validation
1687	GSM324726	GSE12945	Affy U133A	Validation
1688	GSM324728	GSE12945	Affy U133A	Training
1689	GSM324729	GSE12945	Affy U133A	Validation
1690	GSM324734	GSE12945	Affy U133A	Training
1691	GSM324735	GSE12945	Affy U133A	Training
1692	GSM324742	GSE12945	Affy U133A	Training
1693	GSM324743	GSE12945	Affy U133A	Training
1694	GSM324744	GSE12945	Affy U133A	Training
1695	GSM324746	GSE12945	Affy U133A	Training
1696	GSM324747	GSE12945	Affy U133A	Validation
1697	GSM324748	GSE12945	Affy U133A	Training
1698	GSM324749	GSE12945	Affy U133A	Validation
1699	GSM324751	GSE12945	Affy U133A	Validation
1700	GSM324755	GSE12945	Affy U133A	Training
1701	GSM324757	GSE12945	Affy U133A	Validation
1702	GSM324759	GSE12945	Affy U133A	Validation
1703	GSM324761	GSE12945	Affy U133A	Training
1704	GSM324764	GSE12945	Affy U133A	Training
1705	GSM324765	GSE12945	Affy U133A	Training
1706	GSM324766	GSE12945	Affy U133A	Training
1707	GSM324772	GSE12945	Affy U133A	Training
1708	GSM324773	GSE12945	Affy U133A	Training
1709	GSM324774	GSE12945	Affy U133A	Training
1710	GSM324776	GSE12945	Affy U133A	Training
